# Supplementary material
Source: MDPI journal article supplement (https://www.mdpi.com/2504-4990/4/3/34)
Supplement: s1 [file s1]

## Supporting Information

# **VLA-SMILES: Variable-Length-Array SMILES Descriptors in Neural Network-based QSAR Modeling**

Antonina L. Nazarova <sup>1,\*,\dagger</sup> and Aiichiro Nakano <sup>2,\*</sup>

<sup>1</sup> Present: Department of Quantitative & Computational Biology, Bridge Institute, USC Michelson Center for Convergent Bioscience, University of Southern California, Los Angeles, CA 90089, USA

<sup>2</sup> Collaboratory of Advanced Computing and Simulations, Department of Computer Science, Department of Physics & Astronomy, Department of Quantitative & Computational Biology, University of Southern California, Los Angeles, CA 90089, USA

\* Correspondence: nazarova@usc.edu (A.L.N.); anakano@usc.edu (A.N.)

\dagger Past: Loker Hydrocarbon Research Institute, Bridge Institute, Chemistry Department, University of Southern California, Los Angeles, CA 90089, USA.

**Table S1.** Internal parameters of designed neural network-based QSAR models.

| MLP<br>internal parameters | ATransformedBP-<br>based MLP                                                   | iRPROP- based-<br>MLP                                                                                                           | Adam-based MLP | Adam-based DNN<br>(AutoEncoder MLP) |
|----------------------------|--------------------------------------------------------------------------------|---------------------------------------------------------------------------------------------------------------------------------|----------------|-------------------------------------|
| Input format               |                                                                                | Variable-Length-Array-based SMILES<br>$R_1, R_2, R_4, R_6, R_8, R_{12}, R_{16}$ (Dataset#1)<br>$R_1, R_2, R_4, R_8$ (Dataset#2) |                |                                     |
| Testing/Training set       |                                                                                | 50/950 (Dataset#1)<br>70/1300 (Dataset#2)                                                                                       |                |                                     |
| Input nodes                |                                                                                | $d_1=1872/k$ , with $k=1,2,4,6,8,12,16$ (Dataset#1)<br>$d_2=1192/k$ , with $k=1,2,4,8$ (Dataset#2)                              |                |                                     |
| Hidden nodes               |                                                                                | $d_1=1872/k$ , with $k=1,2,4,6,8,12,16$ (Dataset#1)<br>$d_2=1192/k$ , with $k=1,2,4,8$ (Dataset#2)                              |                |                                     |
| Hidden layers              | 1                                                                              | 1, 2                                                                                                                            | 1, 2           | 3                                   |
| Nof epochs                 | 2000 epochs ( $k = 6,8,12,16$ ); 1000 epochs ( $k=4$ ); 200 epochs ( $k=1,2$ ) |                                                                                                                                 |                | same, but 100 epochs for $k=1,2$    |

For each hidden layer, the set of neurons has the same size as the length of the implemented array-featured SMILES representation. The number of the hidden and input layers' neurons was equal to the maximum of the input length of the original database divided by  $k$ .

**Table S2.** Training and prediction results in terms of RMSE for MLPs (single hidden layer) with VLA-SMILES representations, Kennard-Stone-based rational splitting algorithm and ATransformedBP learning, Dataset#1.

| ATransformedBP    | k  | $\gamma_{(opt)}$ | RMSE<br>(training set) | RMSE<br>(testing set) | # of epoch for min.<br>RMSE (test) | N of epochs |
|-------------------|----|------------------|------------------------|-----------------------|------------------------------------|-------------|
| <b>Tanh(Y)</b>    | 1  | 1                | 0.02                   | 0.84                  | 43                                 | 200         |
|                   | 2  | 2                | 0.02                   | 0.80                  | 14                                 | 200         |
|                   | 4  | 3                | 0.004                  | 0.84                  | 59                                 | 1000        |
|                   | 6  | 4                | 0.0003                 | 0.93                  | 1842                               | 2000        |
|                   | 8  | 4                | 0.009                  | 0.90                  | 35                                 | 2000        |
|                   | 12 | 1                | 0.21                   | 0.96                  | 1159                               | 2000        |
|                   | 16 | 3                | 0.05                   | 0.95                  | 375                                | 2000        |
| <b>Sigmoid(Y)</b> | 1  | 2                | 0.06                   | 0.81                  | 35                                 | 200         |
|                   | 2  | 3                | 0.07                   | 0.80                  | 143                                | 300         |
|                   | 4  | 4                | 0.08                   | 0.85                  | 145                                | 500         |
|                   | 6  | 4                | 0.06                   | 0.96                  | 234                                | 1000        |
|                   | 8  | 2                | 0.17                   | 0.89                  | 665                                | 1700        |
|                   | 12 | 3                | 0.15                   | 0.98                  | 713                                | 2000        |
|                   | 16 | 3                | 0.28                   | 0.91                  | 1528                               | 2000        |
| <b>ReLU(Y)</b>    | 1  | 1                | 0.02                   | 0.84                  | 43                                 | 200         |
|                   | 2  | 1                | 0.04                   | 0.82                  | 14                                 | 150         |
|                   | 4  | 4                | 0.02                   | 0.84                  | 48                                 | 400         |
|                   | 6  | 4                | 0.006                  | 0.93                  | 299                                | 500         |
|                   | 8  | 2                | 0.04                   | 0.93                  | 201                                | 2000        |
|                   | 12 | 1                | 0.08                   | 1.02                  | 219                                | 1300        |
|                   | 16 | 3                | 0.04                   | 0.90                  | 143                                | 2000        |

**Table S3.** Training and prediction results in terms of RMSE for MLPs (single hidden layer) with VLA-SMILES representations, the Kennard-Stone-based rational splitting procedure and iRPROP<sup>+</sup> learning, Dataset#1.

| iRPROP-           | k  | RMSE<br>(training set) | RMSE<br>(testing set) | # of epoch for<br>min. RMSE (test) | N of epochs |
|-------------------|----|------------------------|-----------------------|------------------------------------|-------------|
| <b>ReLU(Y)</b>    | 1  | 0.09                   | 0.788                 | 23                                 | 150         |
|                   | 2  | 0.06                   | 0.796                 | 43                                 | 200         |
|                   | 4  | 0.05                   | 0.848                 | 134                                | 1000        |
|                   | 6  | 0.004                  | 0.874                 | 79                                 | 2000        |
|                   | 8  | 0.03                   | 0.887                 | 46                                 | 2000        |
|                   | 12 | 0.15                   | 0.905                 | 196                                | 2000        |
|                   | 16 | 0.11                   | 0.875                 | 319                                | 2000        |
| <b>Tanh(Y)</b>    | 1  | 0.09                   | 0.77                  | 70                                 | 150         |
|                   | 2  | 0.13                   | 0.85                  | 102                                | 200         |
|                   | 4  | 0.08                   | 0.92                  | 490                                | 1000        |
|                   | 6  | 0.04                   | 0.94                  | 297                                | 2000        |
|                   | 8  | 0.06                   | 0.92                  | 609                                | 2000        |
|                   | 12 | 0.16                   | 1.01                  | 300                                | 2000        |
|                   | 16 | 0.15                   | 0.93                  | 866                                | 2000        |
| <b>Sigmoid(Y)</b> | 1  | 0.06                   | 0.77                  | 44                                 | 150         |
|                   | 2  | 0.09                   | 0.77                  | 118                                | 200         |
|                   | 4  | 0.003                  | 0.87                  | 99                                 | 1000        |
|                   | 6  | 0.00005                | 0.84                  | 123                                | 2000        |
|                   | 8  | 0.0008                 | 0.94                  | 137                                | 2000        |
|                   | 12 | 0.005                  | 0.95                  | 115                                | 2000        |
|                   | 16 | 0.005                  | 0.89                  | 113                                | 2000        |

**Table S4.** Training and prediction results in terms of RMSE for MLPs (single hidden layer) with VLA-SMILES representations, the Ranking by Activity-based rational splitting algorithm and iRPROP<sup>+</sup> learning, Dataset#1.

| iRPROP-           | k  | RMSE<br>(training set) | RMSE<br>(testing set) | # of epoch for<br>min. RMSE (test) | N of epochs |
|-------------------|----|------------------------|-----------------------|------------------------------------|-------------|
| <b>ReLU(Y)</b>    | 1  | 0.10                   | 0.92                  | 27                                 | 300         |
|                   | 2  | 0.10                   | 0.91                  | 20                                 | 300         |
|                   | 4  | 0.14                   | 0.90                  | 163                                | 1000        |
|                   | 6  | 0.10                   | 0.87                  | 36                                 | 2000        |
|                   | 8  | 0.14                   | 0.86                  | 22                                 | 2000        |
|                   | 12 | 0.19                   | 0.89                  | 115                                | 2000        |
|                   | 16 | 0.20                   | 0.87                  | 29                                 | 2000        |
| <b>Tanh(Y)</b>    | 1  | 0.12                   | 0.93                  | 8                                  | 300         |
|                   | 2  | 0.15                   | 0.97                  | 20                                 | 300         |
|                   | 4  | 0.12                   | 0.97                  | 6                                  | 1000        |
|                   | 6  | 0.13                   | 0.97                  | 4                                  | 2000        |
|                   | 8  | 0.13                   | 0.94                  | 262                                | 2000        |
|                   | 12 | 0.33                   | 0.98                  | 7                                  | 2000        |
|                   | 16 | 0.22                   | 1.03                  | 181                                | 2000        |
| <b>Sigmoid(Y)</b> | 1  | 0.04                   | 0.87                  | 49                                 | 300         |
|                   | 2  | 0.08                   | 0.95                  | 44                                 | 300         |
|                   | 4  | 0.06                   | 0.89                  | 202                                | 1000        |
|                   | 6  | 0.02                   | 0.87                  | 66                                 | 2000        |
|                   | 8  | 0.10                   | 1.03                  | 56                                 | 2000        |
|                   | 12 | 0.15                   | 0.88                  | 96                                 | 2000        |
|                   | 16 | 0.17                   | 0.94                  | 68                                 | 2000        |

**Table S5.** Training and prediction results in terms of RMSE for MLPs (single hidden layer) with VLA-SMILES representations, Kennard-Stone-based rational splitting procedure and iRPROP<sup>+</sup> learning, Dataset#2.

| <b>Adam</b>        | <b>k</b> | <b>RMSE<br/>(training set)</b> | <b>RMSE<br/>(testing set)</b> | <b># of epoch for<br/>min. RMSE (test)</b> | <b>N of epochs</b> |
|--------------------|----------|--------------------------------|-------------------------------|--------------------------------------------|--------------------|
| <b>ReLU(Y)</b>     | 1        | 0.13                           | 0.87                          | 83                                         | 1000               |
|                    | 2        | 0.11                           | 0.85                          | 63                                         | 1000               |
|                    | 4        | 0.24                           | 0.79                          | 464                                        | 1000               |
|                    | 8        | 0.03                           | 0.92                          | 120                                        | 2000               |
| <b>Sigmoid (Y)</b> | 1        | 0.001                          | 0.84                          | 67                                         | 1000               |
|                    | 2        | 0.001                          | 0.78                          | 90                                         | 1000               |
|                    | 4        | 0.002                          | 0.83                          | 149                                        | 1000               |
|                    | 8        | 0.006                          | 0.92                          | 220                                        | 2000               |
| <b>Tanh(Y)</b>     | 1        | 0.001                          | 0.88                          | 118                                        | 1000               |
|                    | 2        | 0.001                          | 0.88                          | 137                                        | 1000               |
|                    | 4        | 0.006                          | 0.87                          | 247                                        | 1000               |
|                    | 8        | 0.030                          | 0.95                          | 383                                        | 2000               |

**Table S6.** Training and prediction results in terms of RMSE for MLPs (single hidden layer) with VLA-SMILES representations, Kennard-Stone-based rational splitting algorithm and Adam optimizer, Dataset#1.

| <b>Adam</b>       | <b>k</b> | <b>RMSE<br/>(training set)</b> | <b>RMSE<br/>(testing set)</b> | <b># of epoch for<br/>min. RMSE (test)</b> | <b>N of epochs</b> |
|-------------------|----------|--------------------------------|-------------------------------|--------------------------------------------|--------------------|
| <b>ReLU(Y)</b>    | 1        | 0.05                           | 0.86                          | 3                                          | 100                |
|                   | 2        | 0.08                           | 0.82                          | 6                                          | 150                |
|                   | 4        | 0.16                           | 0.82                          | 77                                         | 200                |
|                   | 6        | 0.04                           | 0.95                          | 285                                        | 300                |
|                   | 8        | 0.03                           | 0.92                          | 73                                         | 500                |
|                   | 12       | 0.03                           | 1.00                          | 58                                         | 800                |
|                   | 16       | 0.02                           | 0.90                          | 190                                        | 2000               |
| <b>Tanh(Y)</b>    | 1        | 0.10                           | 0.85                          | 6                                          | 150                |
|                   | 2        | 0.04                           | 0.79                          | 7                                          | 475                |
|                   | 4        | 0.04                           | 0.83                          | 82                                         | 475                |
|                   | 6        | 0.04                           | 0.92                          | 75                                         | 475                |
|                   | 8        | 0.01                           | 0.91                          | 126                                        | 1900               |
|                   | 12       | 0.02                           | 0.99                          | 236                                        | 2000               |
|                   | 16       | 0.02                           | 0.92                          | 514                                        | 2000               |
| <b>Sigmoid(Y)</b> | 1        | 0.05                           | 0.82                          | 43                                         | 100                |
|                   | 2        | 0.05                           | 0.79                          | 66                                         | 200                |
|                   | 4        | 0.08                           | 0.84                          | 242                                        | 500                |
|                   | 6        | 0.01                           | 0.94                          | 816                                        | 1000               |
|                   | 8        | 0.02                           | 0.93                          | 423                                        | 2000               |
|                   | 12       | 0.08                           | 0.99                          | 730                                        | 2000               |
|                   | 16       | 0.36                           | 0.93                          | 1269                                       | 2000               |

**Table S7.** Training and prediction results in terms of RMSE for MLPs (single hidden layer) with VLA-SMILES representations, Ranking by Activity-based rational splitting algorithm and Adam optimizer, Dataset#1.

| <b>Adam</b>       | <b>k</b> | <b>RMSE<br/>(training set)</b> | <b>RMSE<br/>(testing set)</b> | <b># of epoch for<br/>min. RMSE (test)</b> | <b>N of epochs</b> |
|-------------------|----------|--------------------------------|-------------------------------|--------------------------------------------|--------------------|
| <b>ReLU(Y)</b>    | 1        | 0.09                           | 0.98                          | 32                                         | 100                |
|                   | 2        | 0.08                           | 1.12                          | 196                                        | 200                |
|                   | 4        | 0.06                           | 1.11                          | 18                                         | 1000               |
|                   | 6        | 0.03                           | 1.15                          | 22                                         | 2000               |
|                   | 8        | 0.12                           | 1.26                          | 906                                        | 2000               |
|                   | 12       | 0.16                           | 1.12                          | 66                                         | 2000               |
|                   | 16       | 0.18                           | 1.00                          | 109                                        | 2000               |
| <b>Tanh(Y)</b>    | 1        | 0.13                           | 0.93                          | 132                                        | 150                |
|                   | 2        | 0.09                           | 1.15                          | 127                                        | 200                |
|                   | 4        | 0.08                           | 1.19                          | 161                                        | 1000               |
|                   | 6        | 0.09                           | 1.19                          | 128                                        | 2000               |
|                   | 8        | 0.13                           | 1.35                          | 28                                         | 2000               |
|                   | 12       | 0.18                           | 1.14                          | 264                                        | 2000               |
|                   | 16       | 0.30                           | 1.29                          | 1                                          | 2000               |
| <b>Sigmoid(Y)</b> | 1        | 0.07                           | 1.01                          | 38                                         | 150                |
|                   | 2        | 0.11                           | 1.18                          | 193                                        | 200                |
|                   | 4        | 0.10                           | 1.14                          | 11                                         | 1000               |
|                   | 6        | 0.10                           | 1.21                          | 7                                          | 2000               |
|                   | 8        | 0.16                           | 1.29                          | 2                                          | 2000               |
|                   | 12       | 0.22                           | 1.11                          | 750                                        | 2000               |
|                   | 16       | 0.23                           | 1.26                          | 1                                          | 2000               |



**Table S8.** Training and prediction results in terms of RMSE for MLPs (two hidden layers) with VLA-SMILES representations, Kennard-Stone-based rational splitting algorithm and iRPROP- learning, Dataset#1.

| iRPROP-           | k  | RMSE<br>(training set) | RMSE<br>(testing set) | # of epoch for<br>min. RMSE (test) | N of epochs |
|-------------------|----|------------------------|-----------------------|------------------------------------|-------------|
| <b>Tanh(Y)</b>    | 1  | 0.05                   | 0.90                  | 32                                 | 200         |
|                   | 2  | 0.05                   | 0.79                  | 82                                 | 200         |
|                   | 4  | 0.003                  | 0.83                  | 134                                | 1000        |
|                   | 6  | 0.0006                 | 0.89                  | 243                                | 2000        |
|                   | 8  | 0.001                  | 0.92                  | 128                                | 2000        |
|                   | 12 | 0.005                  | 0.97                  | 180                                | 2000        |
|                   | 16 | 0.010                  | 0.95                  | 357                                | 2000        |
| <b>Sigmoid(Y)</b> | 1  | 0.05                   | 0.81                  | 84                                 | 200         |
|                   | 2  | 0.09                   | 0.87                  | 48                                 | 200         |
|                   | 4  | 0.03                   | 0.85                  | 151                                | 1000        |
|                   | 6  | 0.003                  | 0.89                  | 107                                | 2000        |
|                   | 8  | 0.003                  | 0.85                  | 115                                | 2000        |
|                   | 12 | 0.02                   | 0.98                  | 87                                 | 2000        |
|                   | 16 | 0.01                   | 0.90                  | 119                                | 2000        |

**Table S9.** Training and prediction results in terms of RMSE for MLPs (two hidden layers) with VLA-SMILES representations, Kennard-Stone-based rational splitting algorithm and Adam learning, Dataset#1.

| Adam              | k  | RMSE<br>(training set) | RMSE<br>(testing set) | # of epoch for<br>min. RMSE (test) | N of epochs |
|-------------------|----|------------------------|-----------------------|------------------------------------|-------------|
| <b>Tanh(Y)</b>    | 1  | 0.15                   | 0.90                  | 4                                  | 100         |
|                   | 2  | 0.03                   | 0.84                  | 19                                 | 200         |
|                   | 4  | 0.01                   | 0.86                  | 167                                | 1000        |
|                   | 6  | 0.01                   | 0.94                  | 356                                | 2000        |
|                   | 8  | 0.05                   | 0.95                  | 906                                | 2000        |
|                   | 12 | 0.14                   | 1.00                  | 655                                | 2000        |
|                   | 16 | 0.18                   | 0.91                  | 1541                               | 2000        |
| <b>Sigmoid(Y)</b> | 1  | 0.06                   | 0.81                  | 83                                 | 150         |
|                   | 2  | 0.07                   | 0.80                  | 406                                | 650         |
|                   | 4  | 0.11                   | 0.86                  | 639                                | 1350        |
|                   | 6  | 0.41                   | 1.01                  | 473                                | 550         |
|                   | 8  | 0.17                   | 0.94                  | 707                                | 1000        |
|                   | 12 | 0.22                   | 0.98                  | 458                                | 2000        |
|                   | 16 | 0.25                   | 0.90                  | 1682                               | 2000        |

**Table S10.** Training and prediction results in terms of RMSE for MLPs with Autoencoder (three hidden layers), VLA-SMILES representations, Kennard-Stone-based rational splitting procedure and iRPROP<sup>-</sup> learning, Dataset#1.

| <b>iRPROP<sup>-</sup></b> | <b>k</b> | <b>RMSE<br/>(training set)</b> | <b>RMSE<br/>(testing set)</b> | <b># of epoch for<br/>min. RMSE (test)</b> | <b>N of epochs</b> |
|---------------------------|----------|--------------------------------|-------------------------------|--------------------------------------------|--------------------|
| <b>Sigmoid(Y)</b>         | 1        | 0.05                           | 0.85                          | 23                                         | 100                |
|                           | 2        | 0.06                           | 0.84                          | 74                                         | 200                |
|                           | 4        | 0.02                           | 0.88                          | 263                                        | 1100               |
|                           | 6        | 0.05                           | 0.94                          | 255                                        | 1100               |
|                           | 8        | 0.07                           | 0.99                          | 867                                        | 2000               |
|                           | 12       | 0.32                           | 1.03                          | 444                                        | 1300               |
|                           | 16       | 0.18                           | 0.92                          | 1823                                       | 2000               |

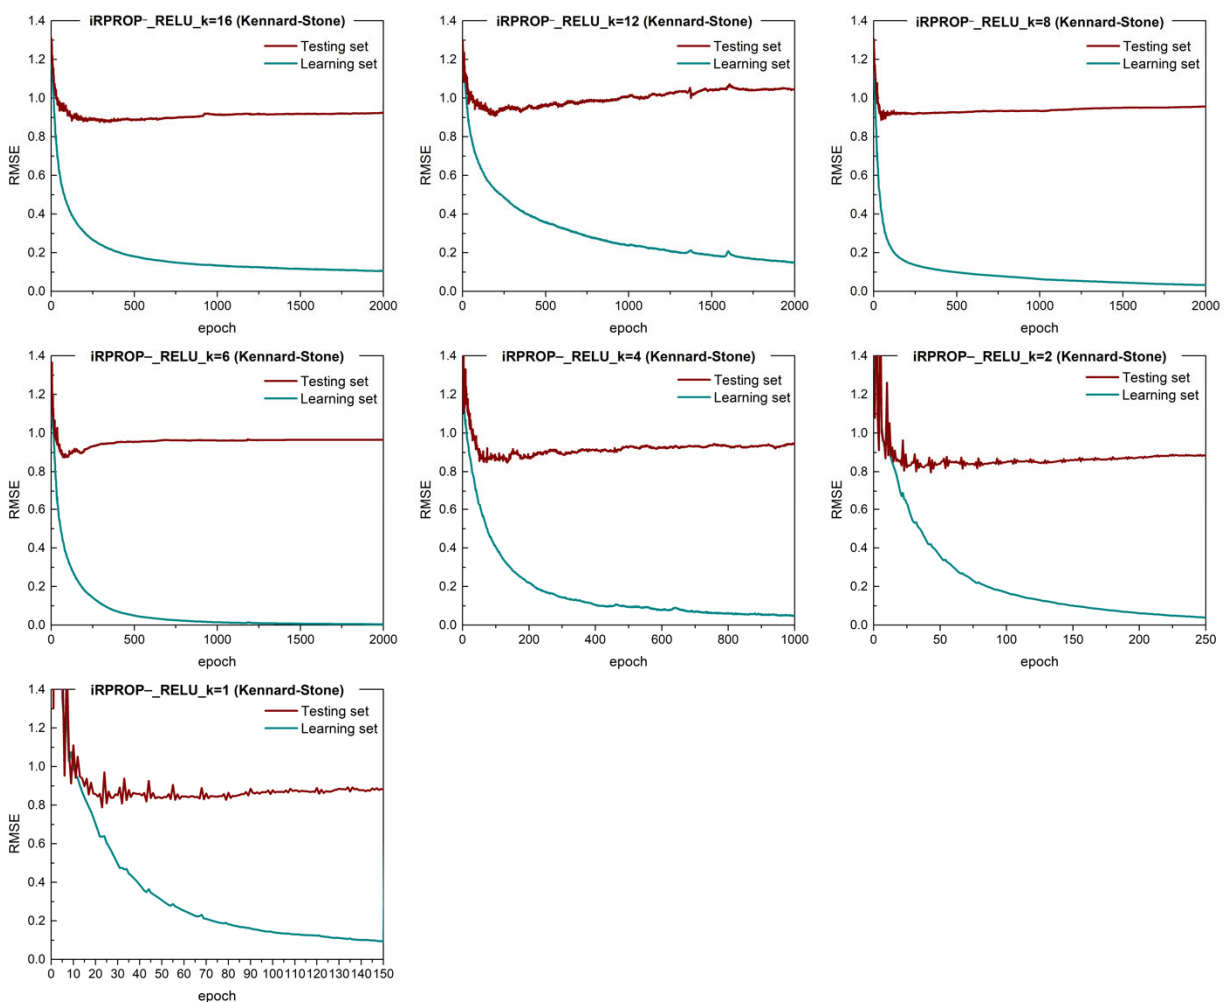

**Figure S1.** RMSE as a function of epoch for learning (training) and testing sets for an MLP with one hidden layer with iRPROP<sup>+</sup> learning algorithm and variable-length-array SMILES representation (ReLU activation, Kennard-Stone-based rational splitting algorithm), Dataset#1.

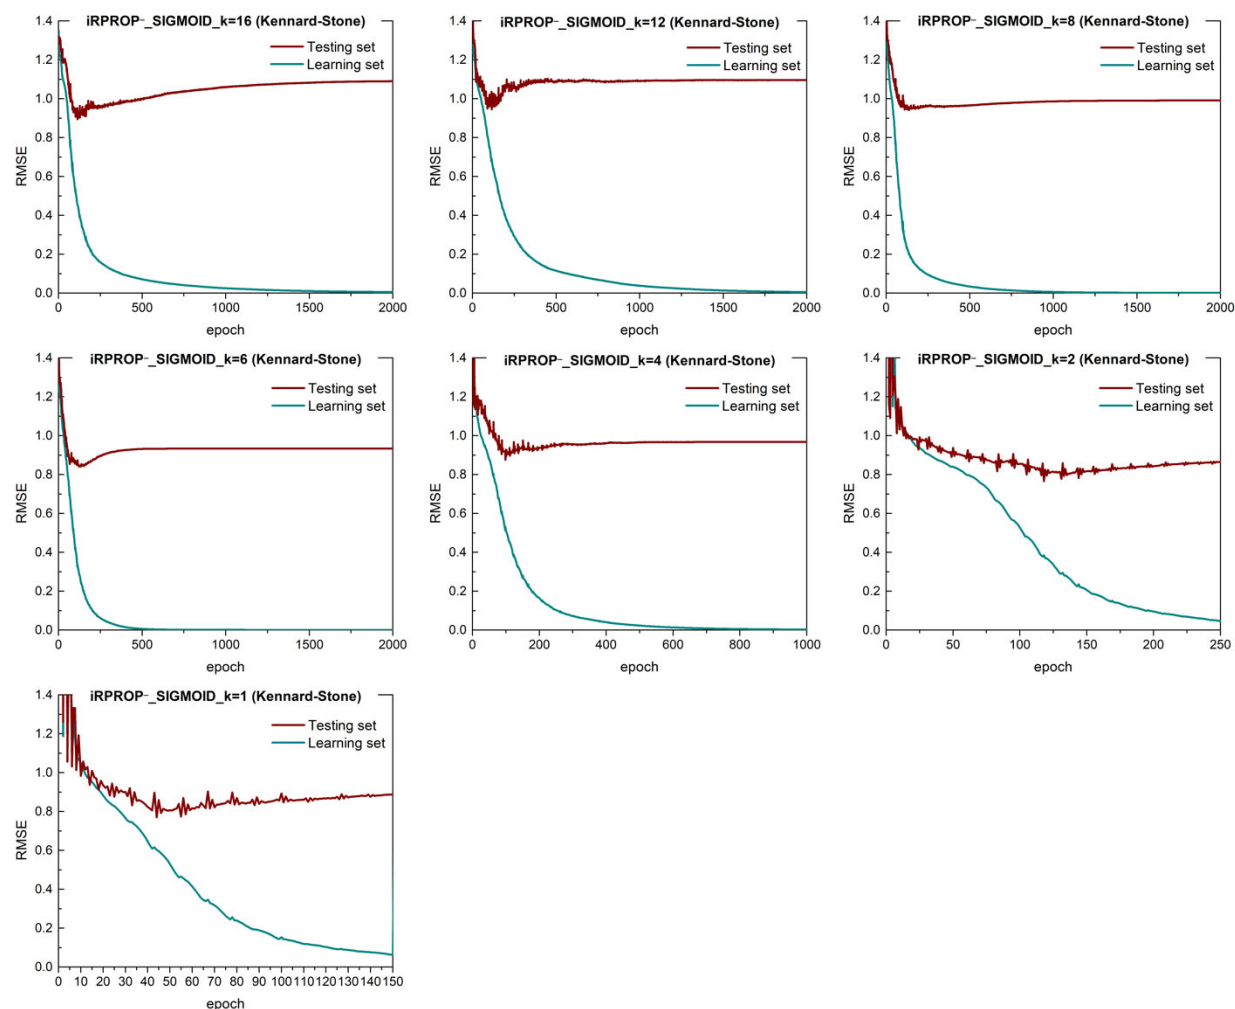

**Figure S2.** RMSE as a function of epoch for learning (training) and testing sets for an MLP with one hidden layer with iRPROP<sup>+</sup> learning algorithm and variable-length-array SMILES representation (Sigmoid activation, Kennard-Stone-based rational splitting algorithm), Dataset#1.

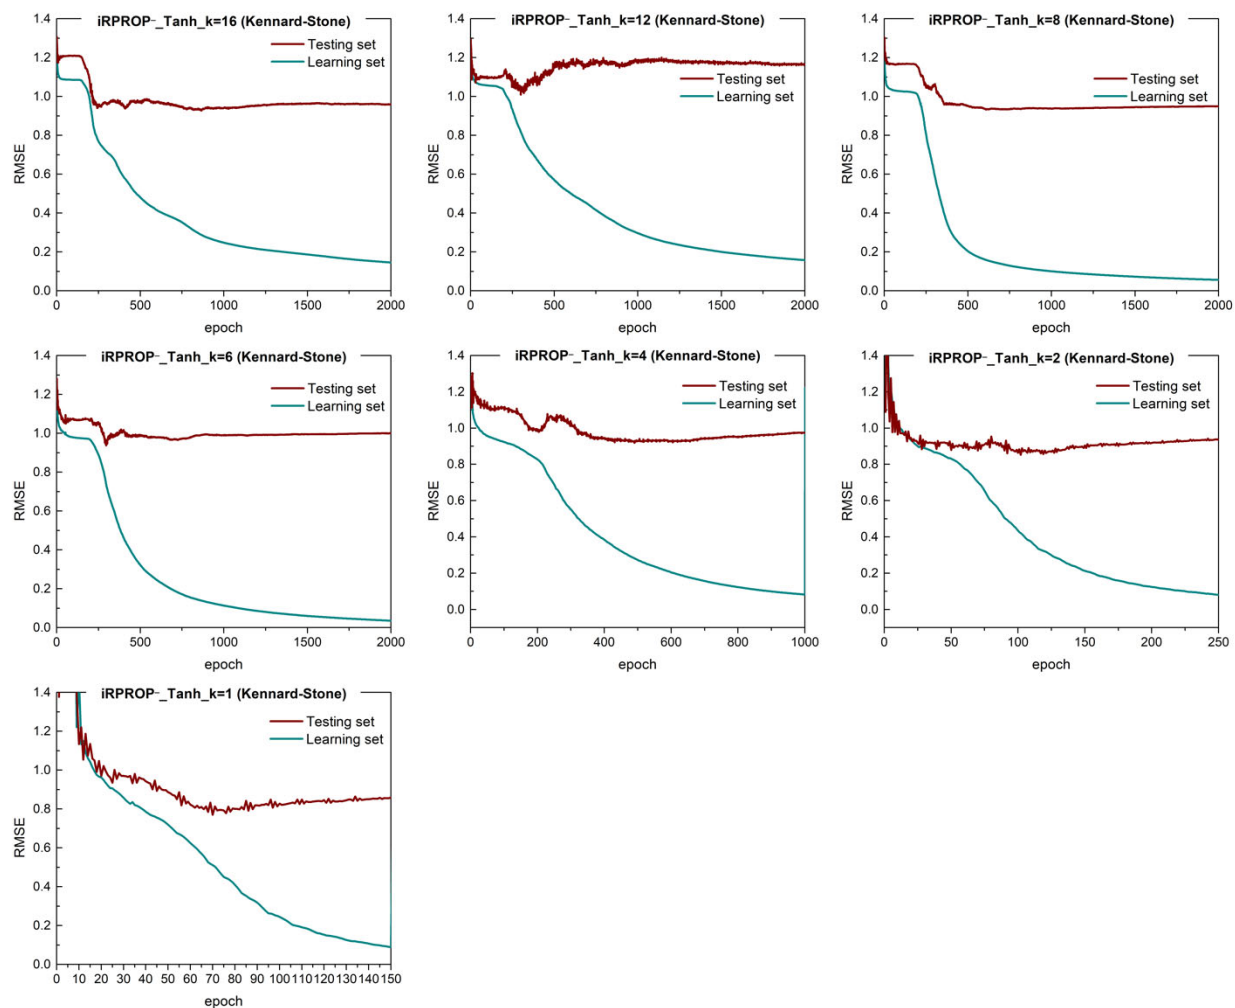

**Figure S3.** RMSE as a function of epoch for learning (training) and testing sets for an MLP with one hidden layer with iRPROP<sup>+</sup> learning algorithm and variable-length-array SMILES representation (Tanh activation, Kennard-Stone-based rational splitting algorithm), Dataset#1.

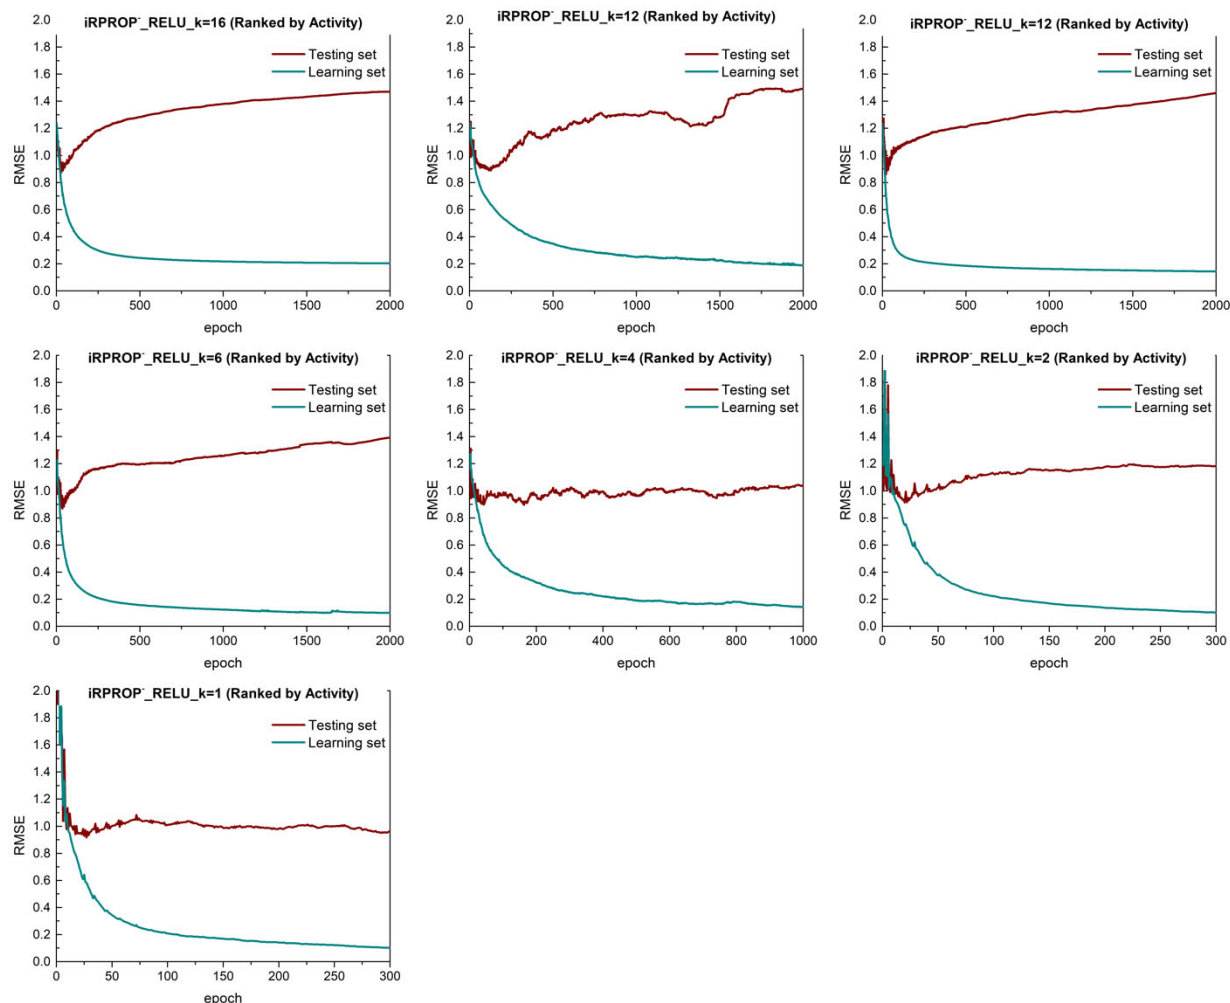

**Figure S4.** RMSE as a function of epoch for learning (training) and testing sets for an MLP with one hidden layer with iRPROP<sup>+</sup> learning algorithm and variable-length-array SMILES representation (ReLU activation, Ranking by Activity-based rational splitting algorithm), Dataset#1.

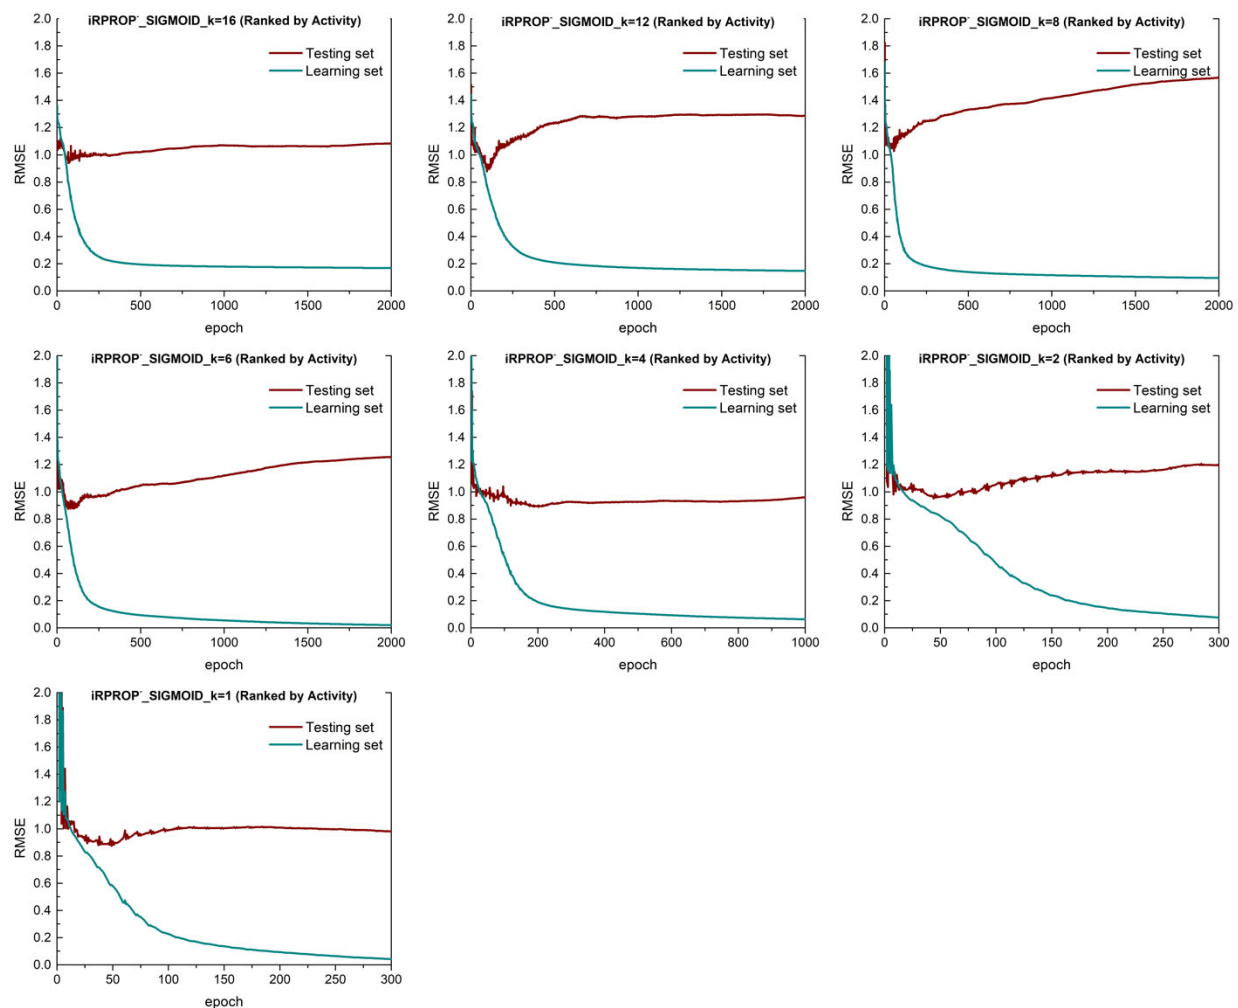

**Figure S5.** RMSE as a function of epoch for learning (training) and testing sets for an MLP with one hidden layer with iRPROP<sup>-</sup> learning algorithm and variable-length-array SMILES representation (Sigmoid activation, Ranking by Activity-based rational splitting algorithm), Dataset#1.

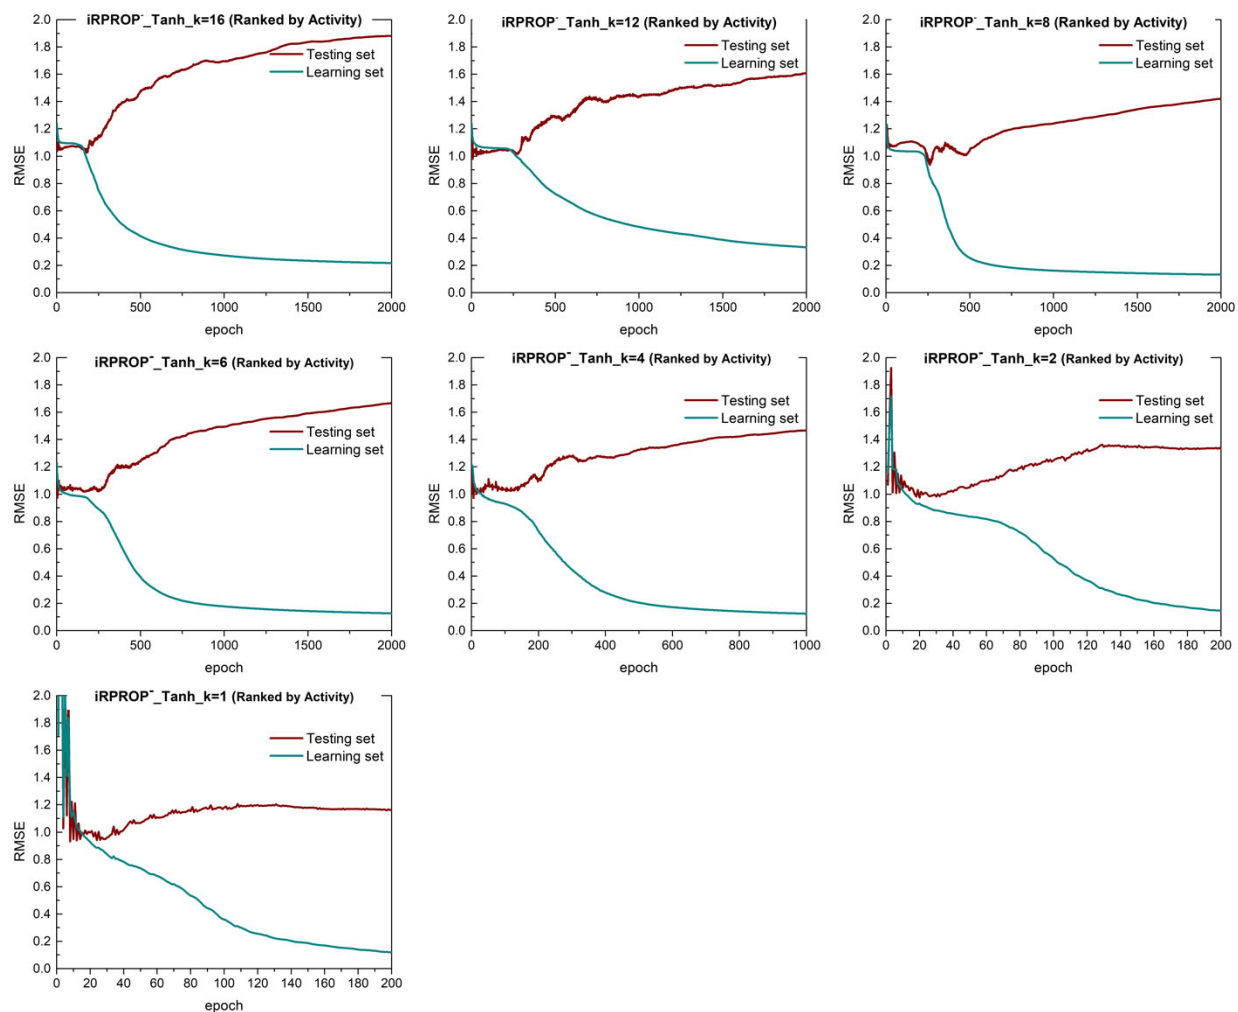

**Figure S6.** RMSE as a function of epoch for learning (training) and testing sets for an MLP with one hidden layer with iRPROP<sup>+</sup> learning algorithm and variable-length-array SMILES representation (Tanh activation, Ranking by Activity-based rational splitting algorithm), Dataset#1.



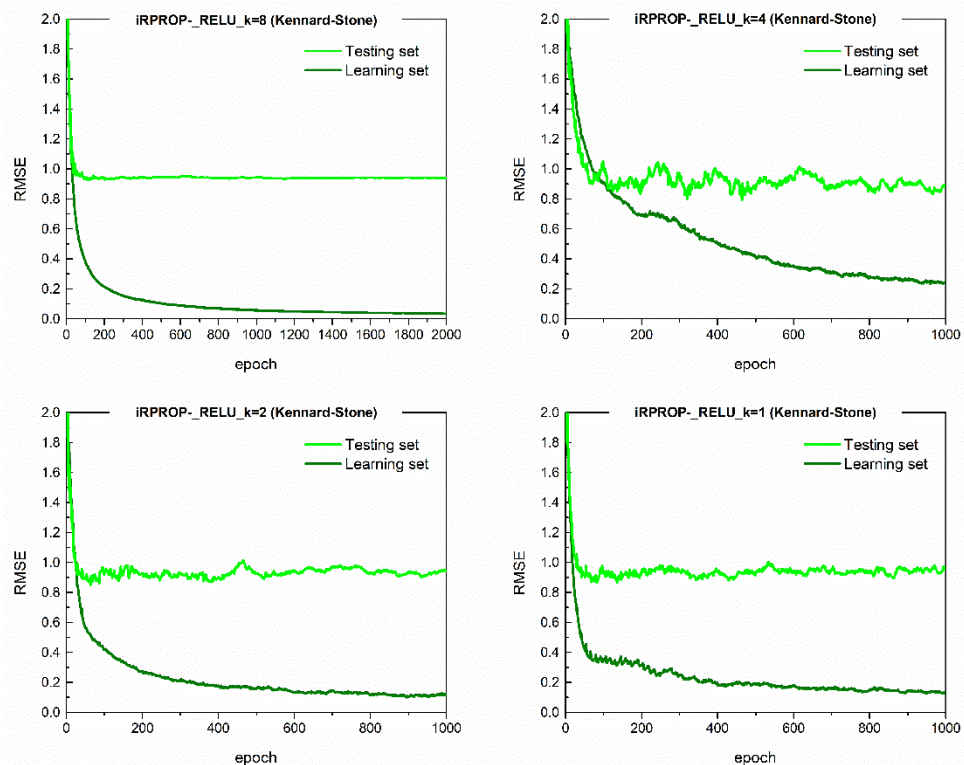

**Figure S7.** RMSE as a function of epoch for learning (training) and testing sets for an MLP with one hidden layer with iRPROP learning algorithm and variable-length-array SMILES representation (RELU activation, Kennard-Stone-based rational splitting algorithm), Dataset#2

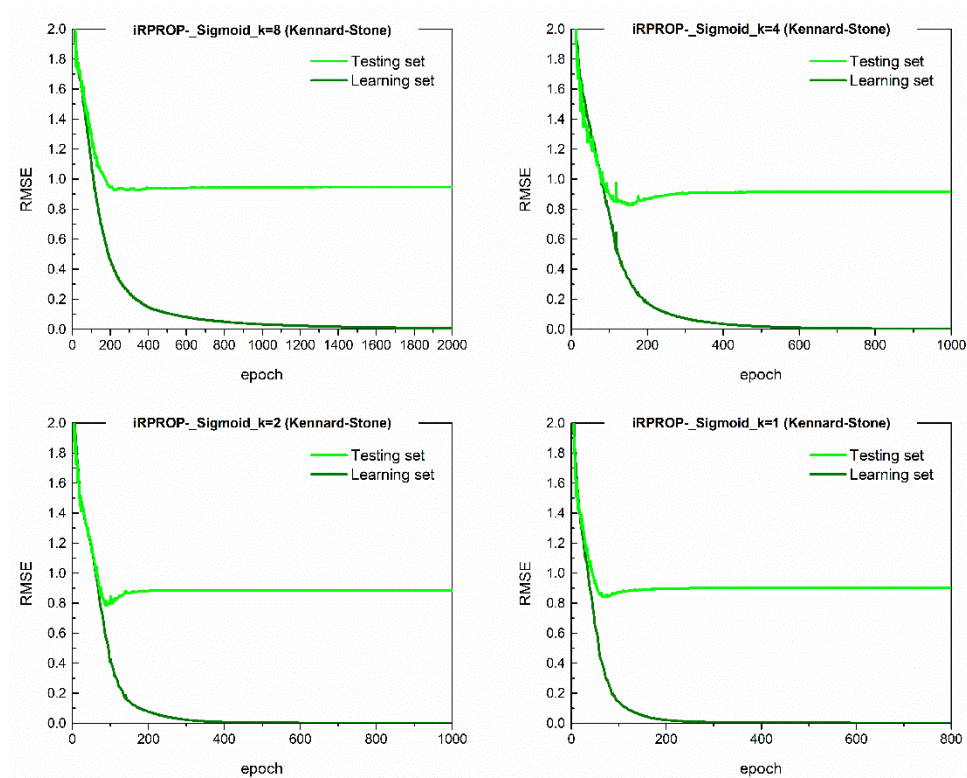

**Figure S8.** RMSE as a function of epoch for learning (training) and testing sets for an MLP with one hidden layer with iRPROP learning algorithm and variable-length-array SMILES representation (Sigmoid activation, Kennard-Stone-based rational splitting algorithm), Dataset#2

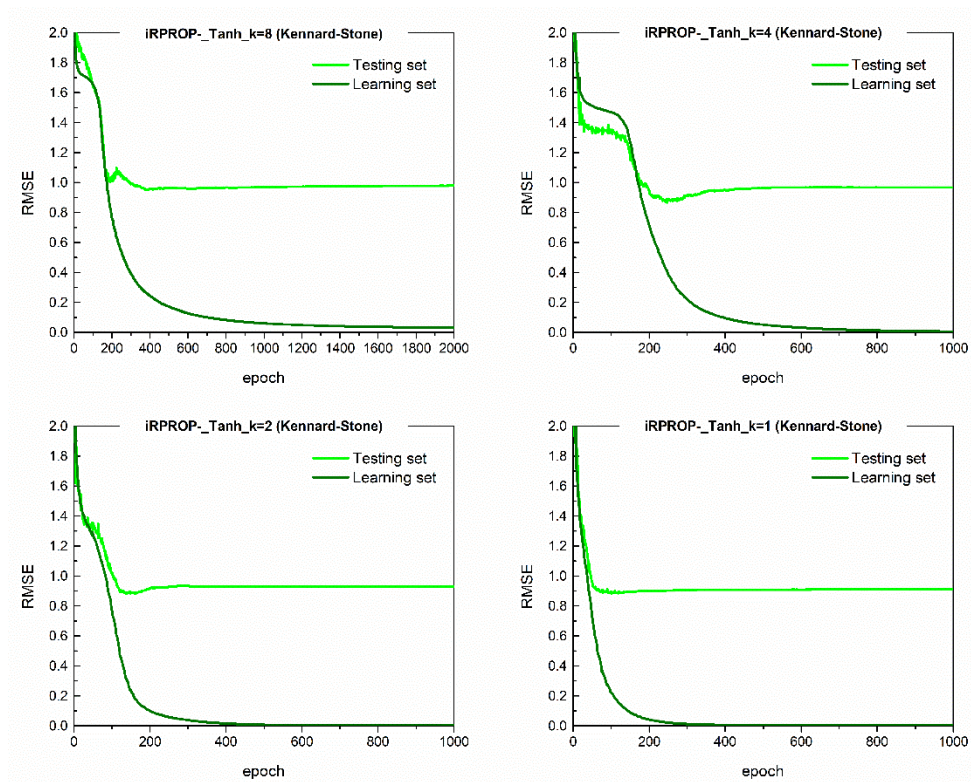

**Figure S9.** RMSE as a function of epoch for learning (training) and testing sets for an MLP with one hidden layer with iRPROP<sup>+</sup> learning algorithm and variable-length-array SMILES representation (Tanh activation, Kennard-Stone-based rational splitting algorithm), Dataset#2

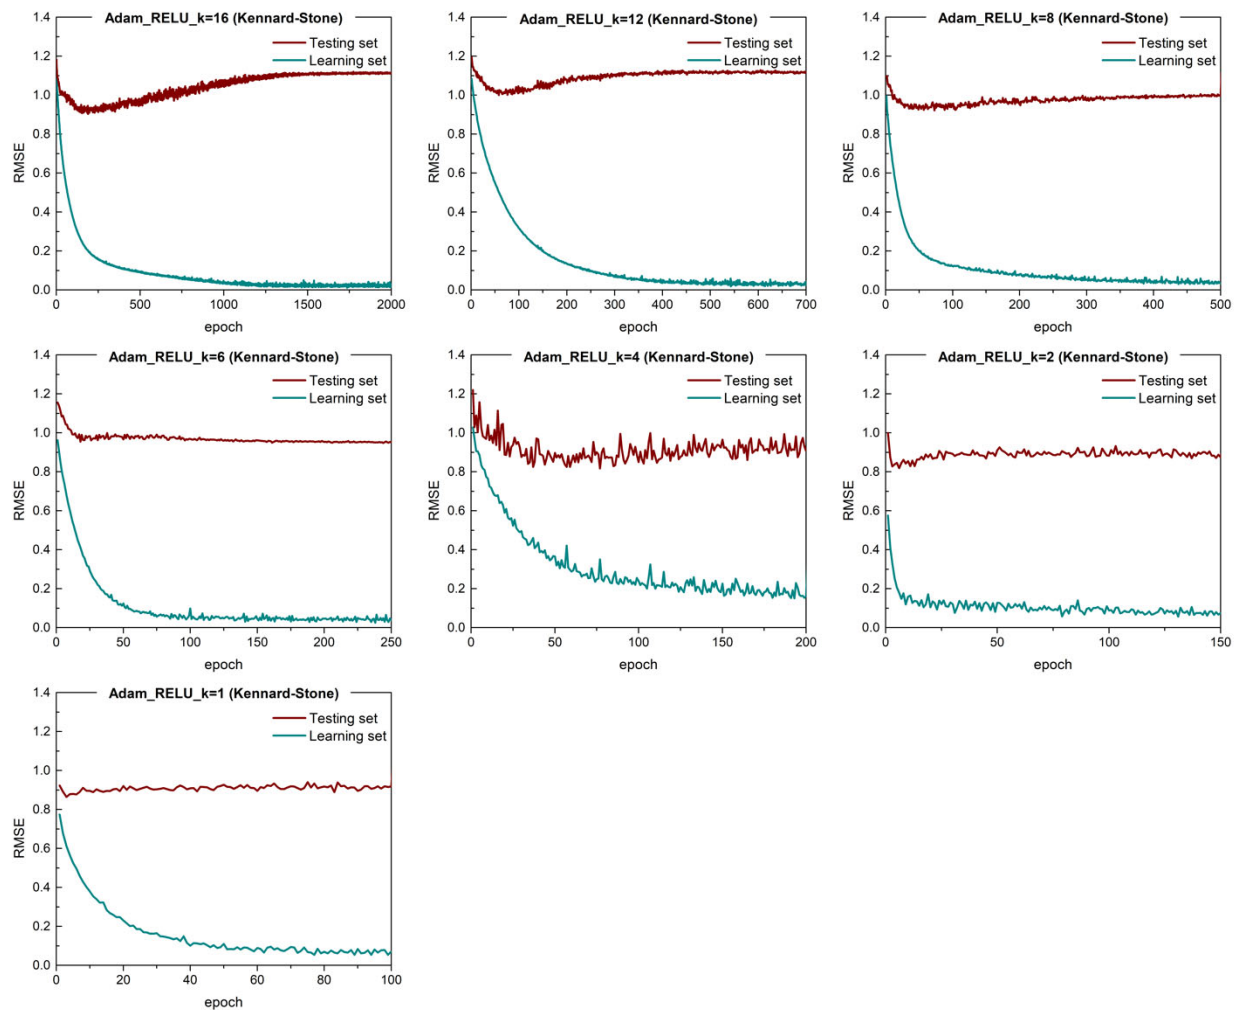

**Figure S10.** RMSE as a function of epoch for learning (training) and testing sets for an MLP with one hidden layer with Adam learning algorithm and variable-length-array SMILES representation (ReLU activation, Kennard-Stone-based rational splitting algorithm), Dataset#1.

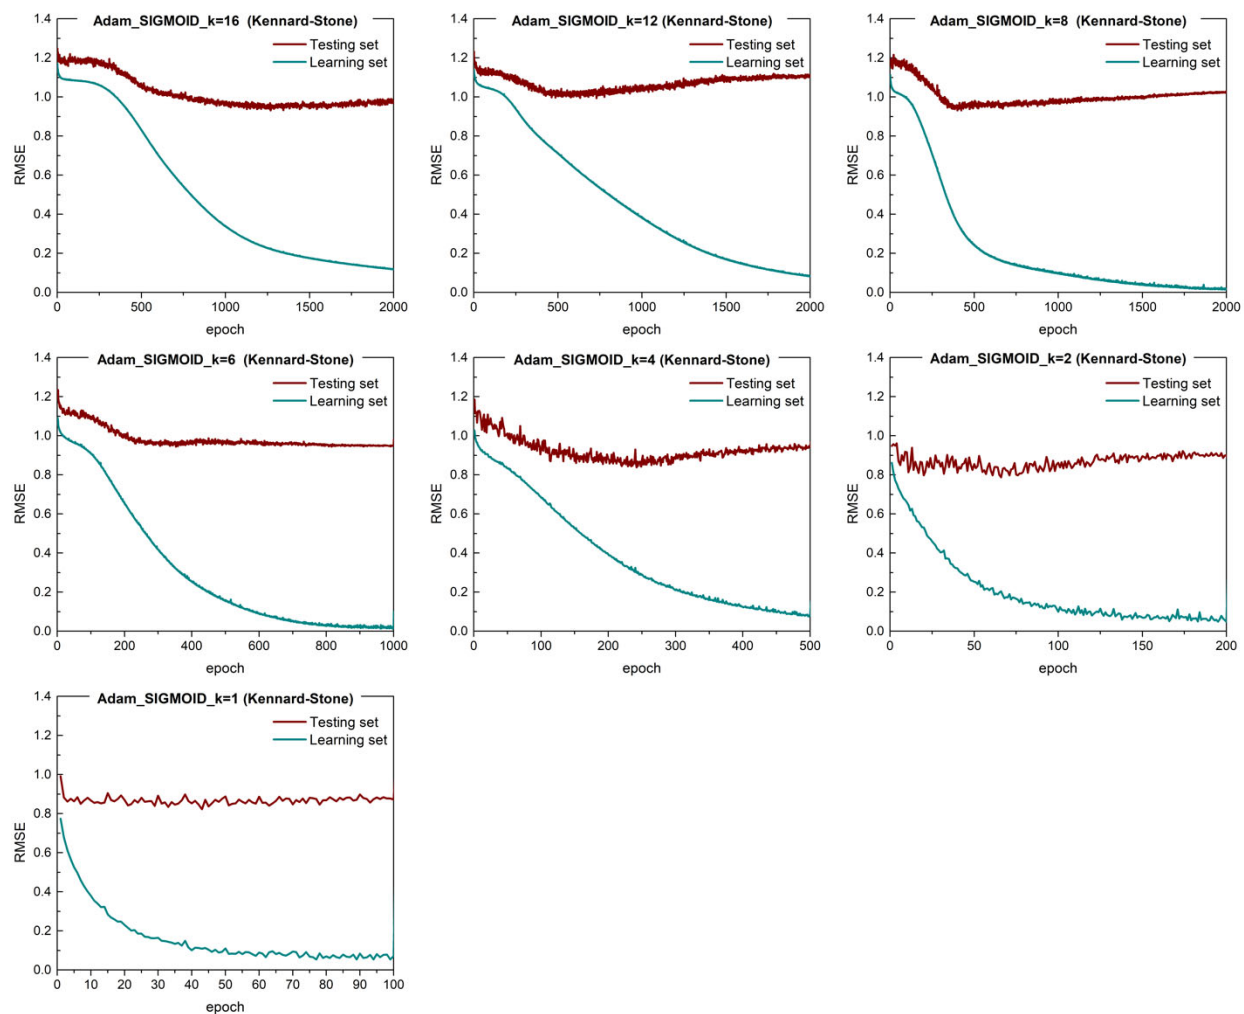

**Figure S11.** RMSE as a function of epoch for learning (training) and testing sets for an MLP with one hidden layer with Adam learning algorithm and variable-length-array SMILES representation (Sigmoid activation, Kennard-Stone-based rational splitting algorithm), Dataset#1.



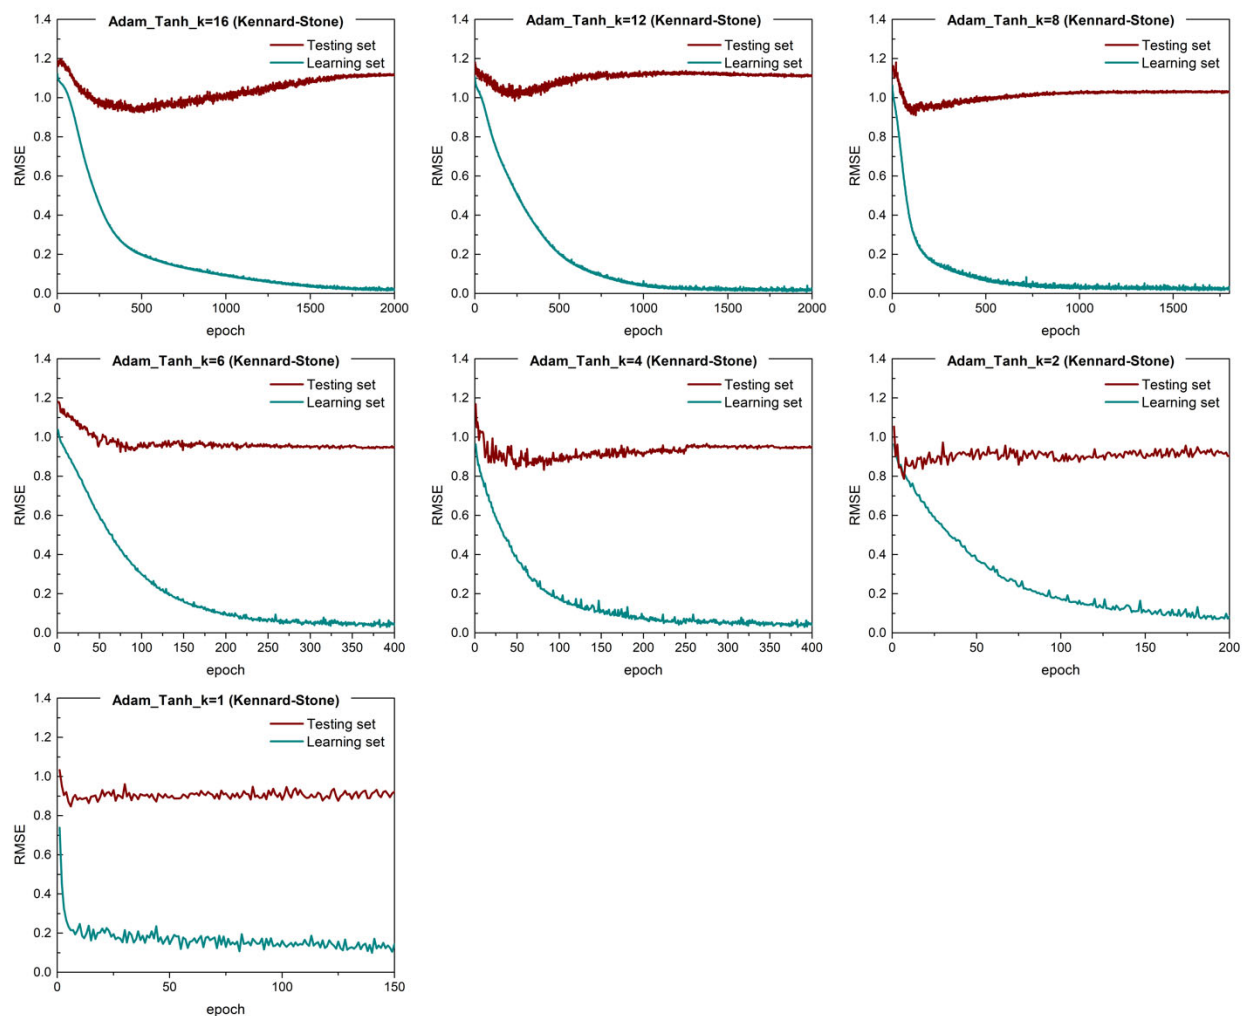

**Figure S12.** RMSE as a function of epoch for learning (training) and testing sets for an MLP with one hidden layer with Adam learning algorithm and variable-length-array SMILES representation (Tanh activation, Kennard-Stone-based rational splitting algorithm), Dataset#1.

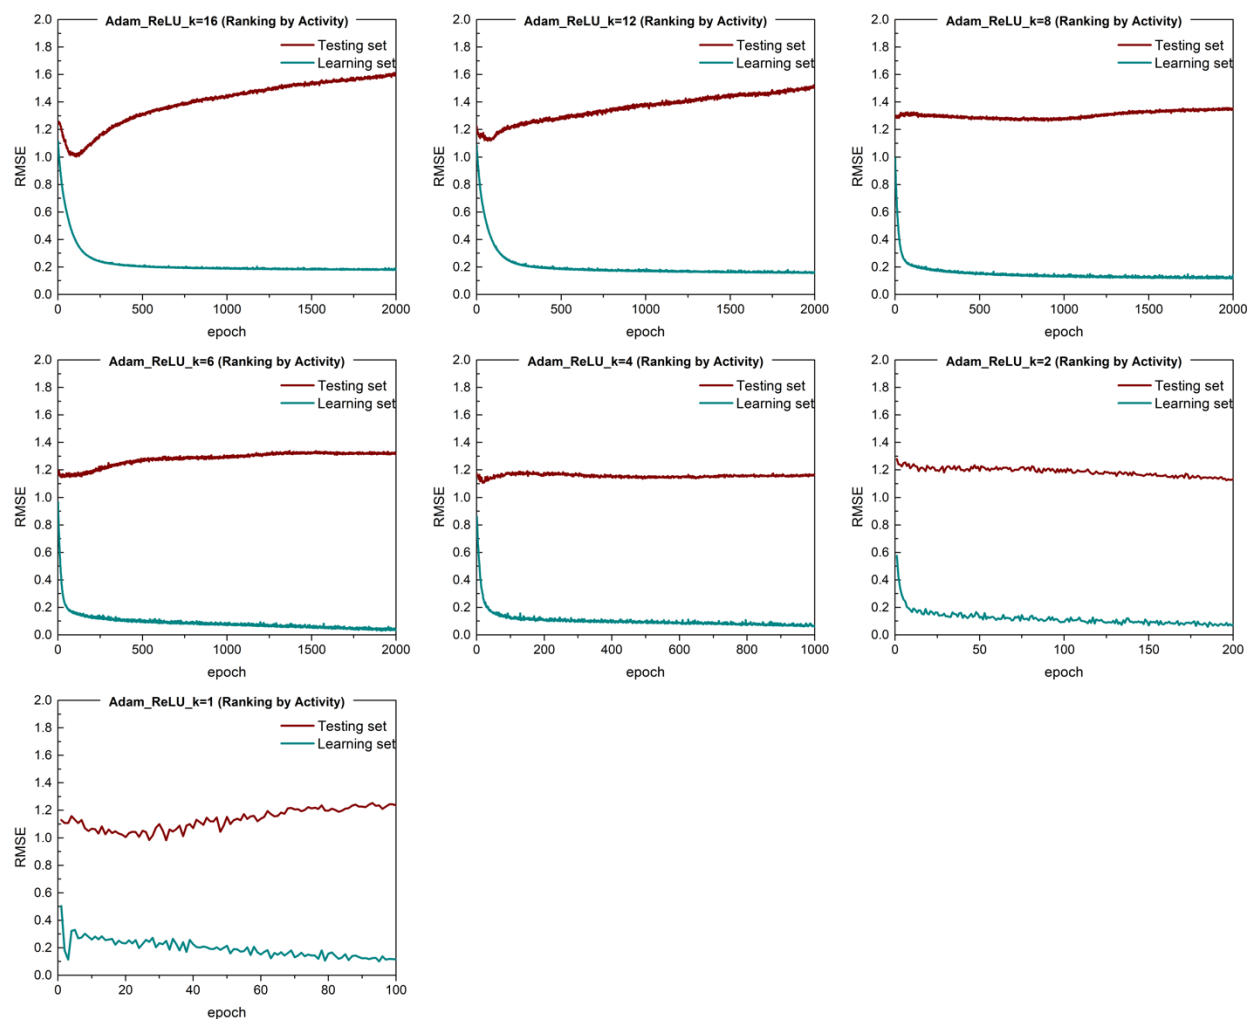

**Figure S13.** RMSE as a function of epoch for learning (training) and testing sets for an MLP with one hidden layer with Adam learning algorithm and variable-length-array SMILES representation (ReLU activation, Ranking by Activity-based rational splitting algorithm), Dataset#1.

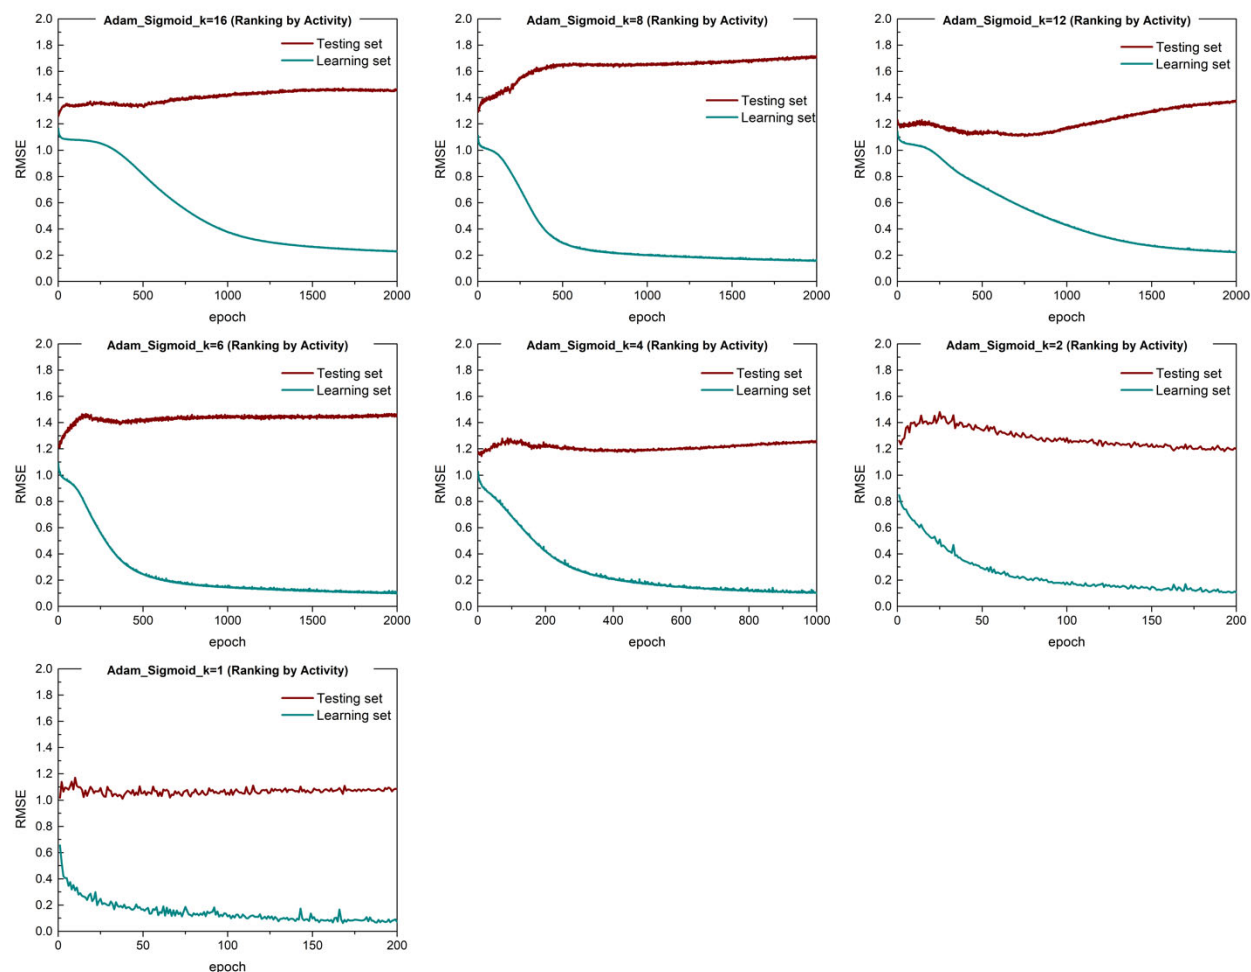

**Figure S14.** RMSE as a function of epoch for learning (training) and testing sets for an MLP with one hidden layer with Adam learning algorithm and variable-length-array SMILES representation (Sigmoid activation, Ranking by Activity-based rational splitting algorithm), Dataset#1.



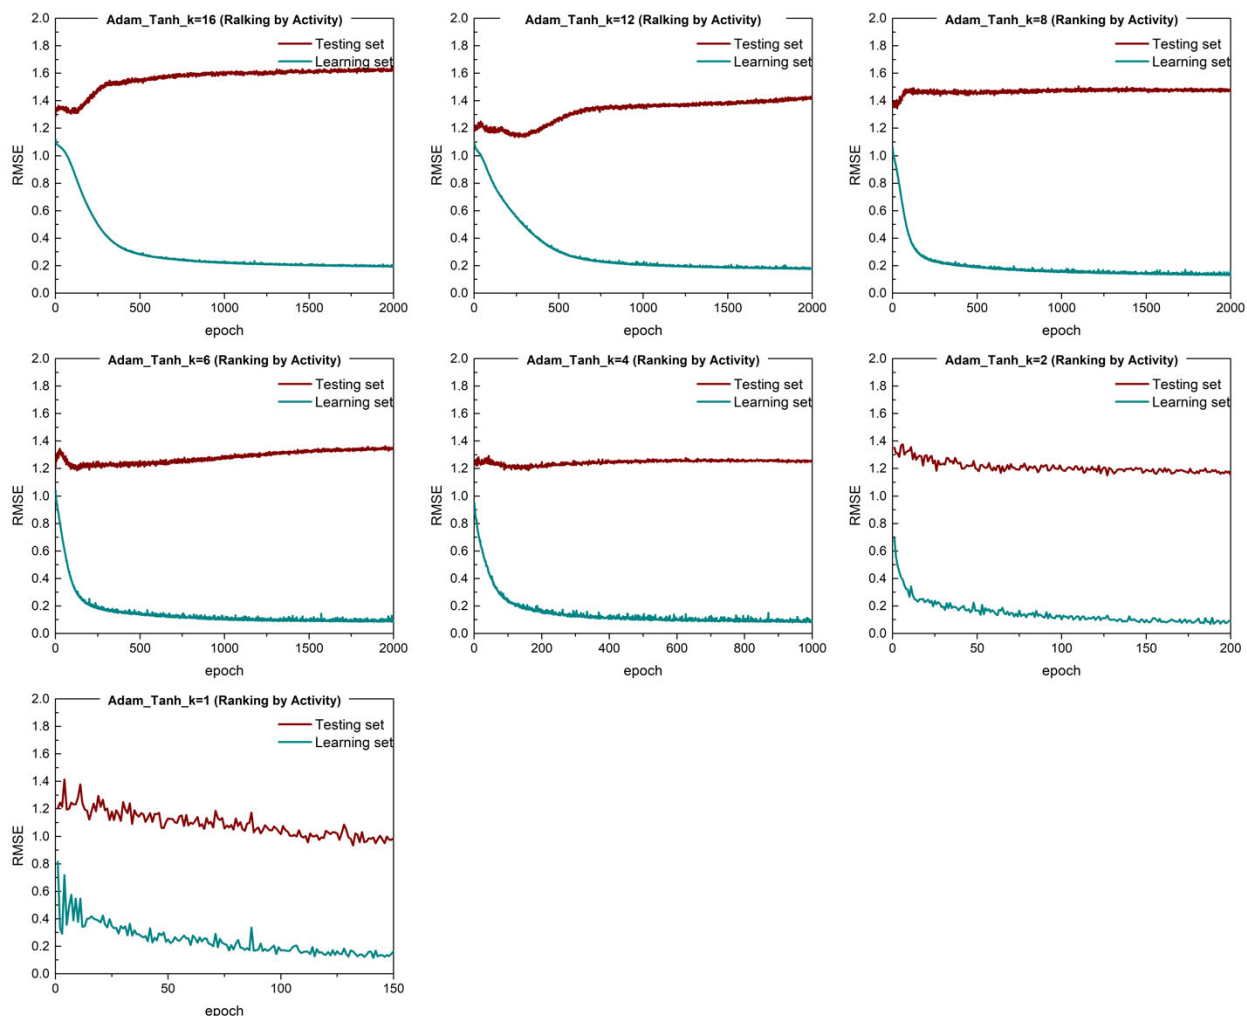

**Figure S15.** RMSE as a function of epoch for learning (training) and testing sets for an MLP with one hidden layer with Adam learning algorithm and variable-length-array SMILES representation (Tanh activation, Ranking by Activity-based rational splitting algorithm), Dataset#1.

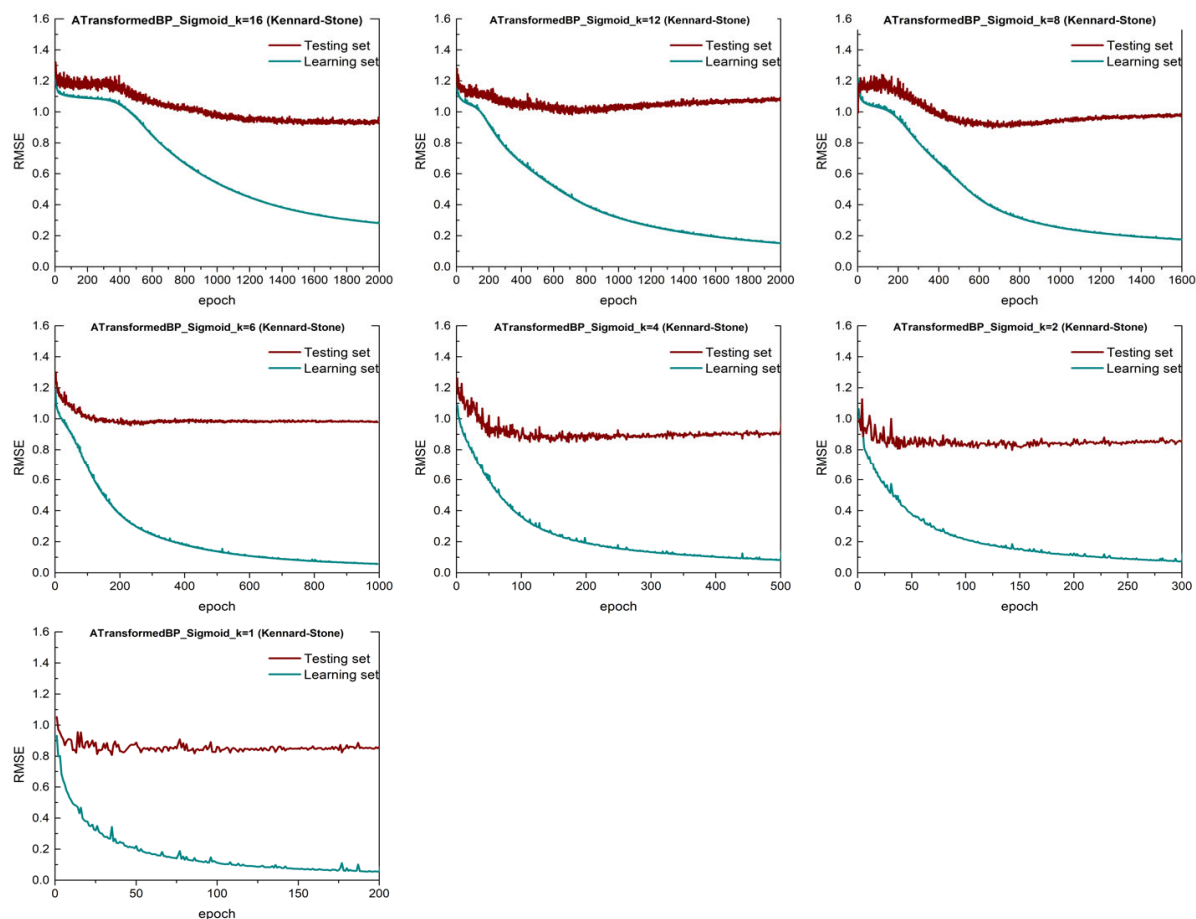

**Figure S16.** RMSE as a function of epoch for learning (training) and testing sets for an MLP with one hidden layer with ATransformedBP learning algorithm and variable-length-array SMILES representation (Sigmoid activation, Kennard-Stone-based rational splitting algorithm), Dataset#1.

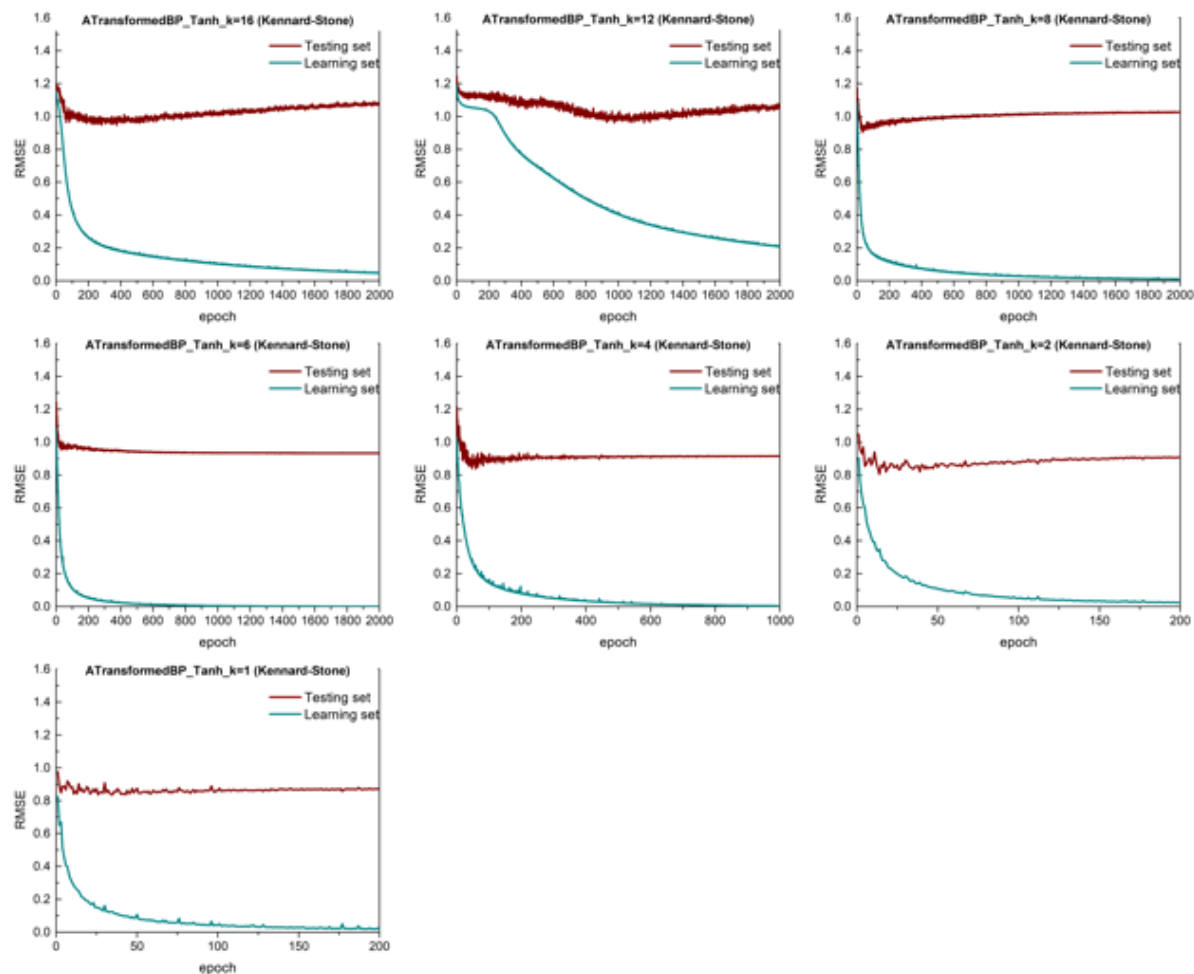

**Figure S17.** RMSE as a function of epoch for learning (training) and testing sets for an MLP with one hidden layer with ATransformedBP learning algorithm and variable-length-array SMILES representation (Tanh activation, Kennard-Stone-based rational splitting algorithm), Dataset#1.

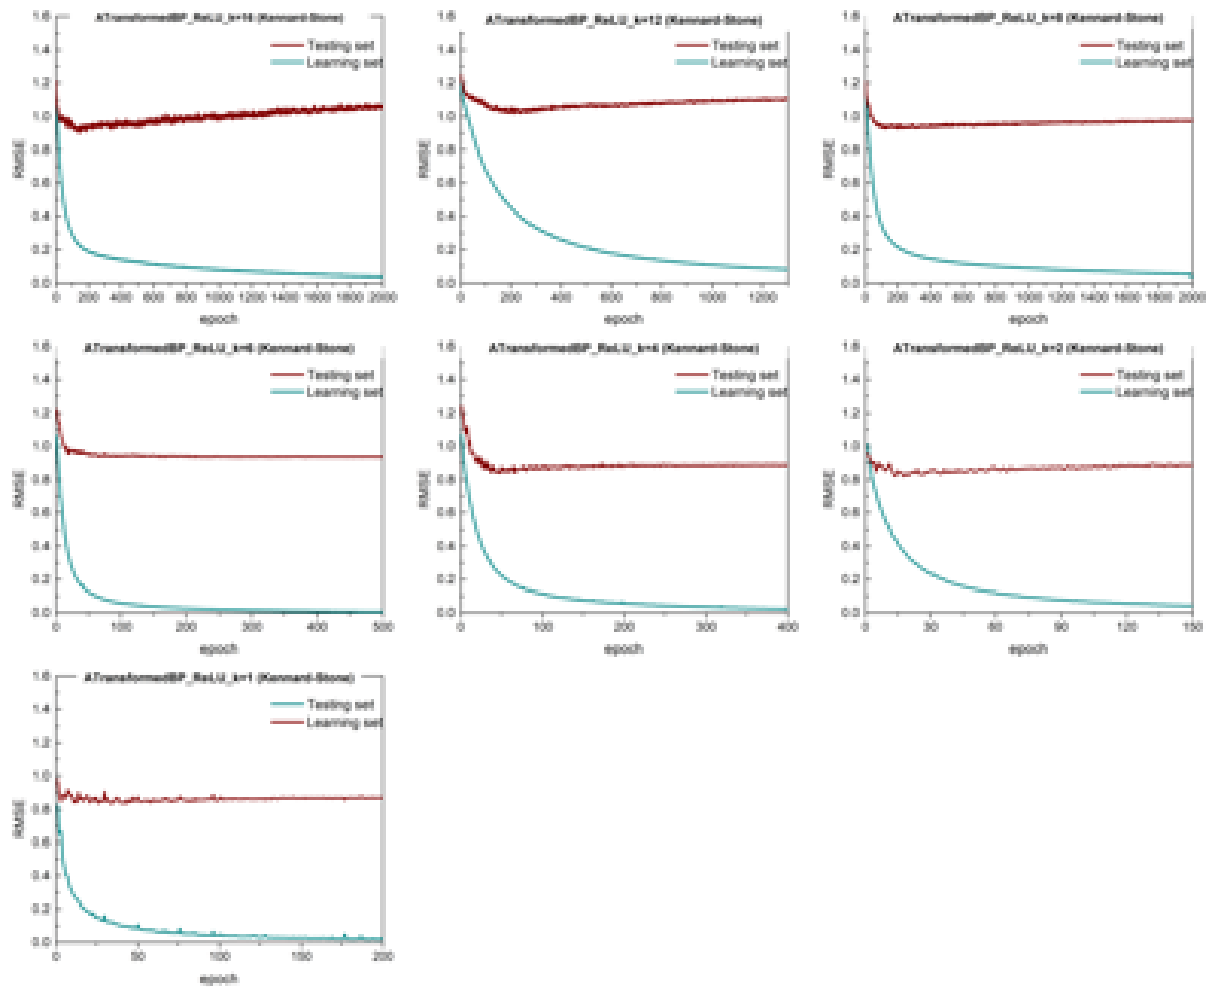

**Figure S18.** RMSE as a function of epoch for learning (training) and testing sets for an MLP with one hidden layer with ATransformedBP learning algorithm and variable-length-array SMILES representation (Tanh activation, Kennard-Stone-based rational splitting algorithm), Dataset#1.

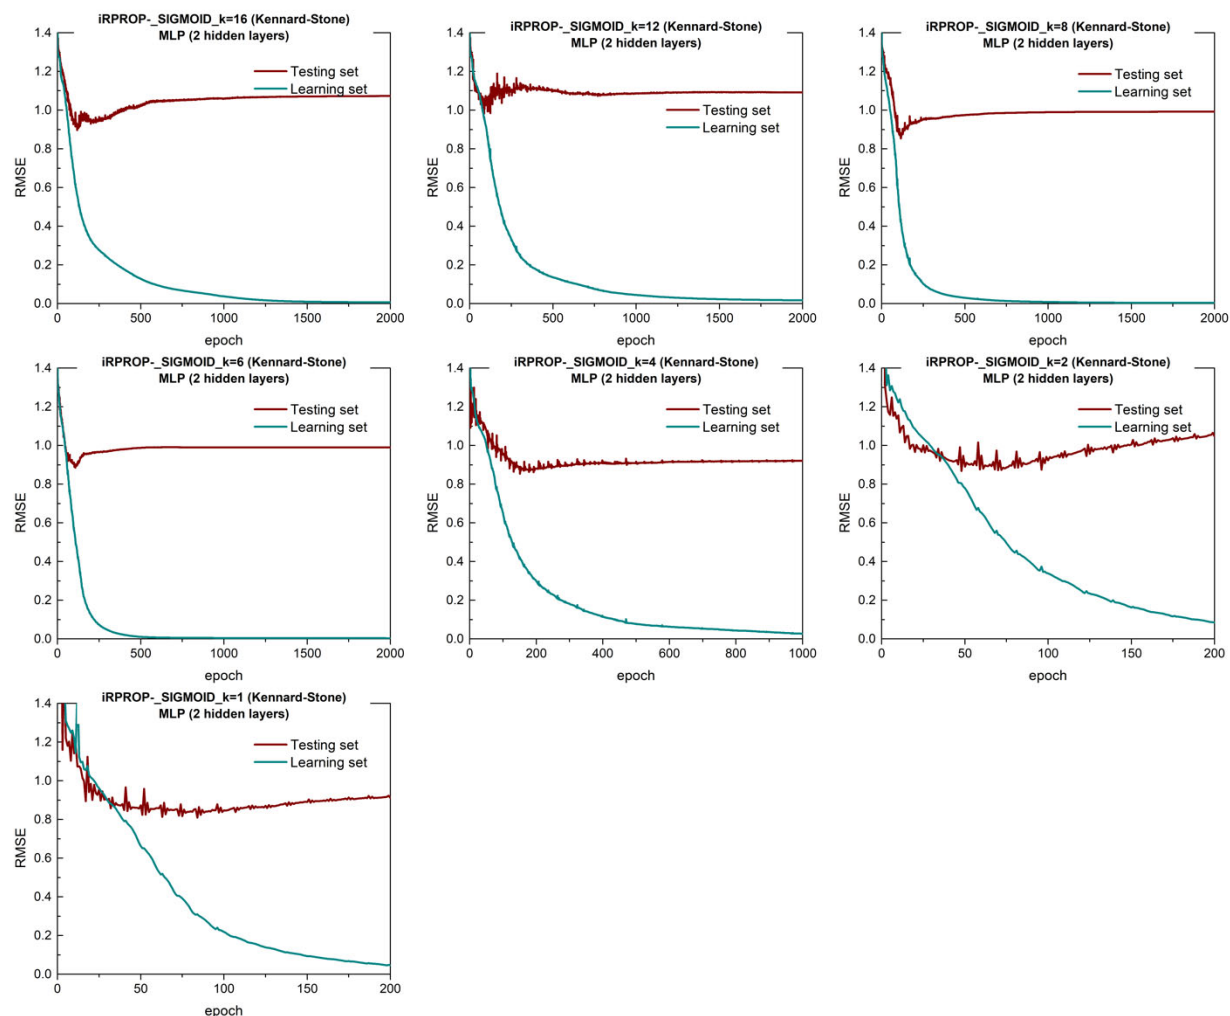

**Figure S19.** RMSE as a function of epoch for learning (training) and testing sets for an MLP with two hidden layers with iRPROP<sup>+</sup> learning algorithm and variable-length-array SMILES representation (Sigmoid activation, Kennard-Stone-based rational splitting algorithm), Dataset#1.

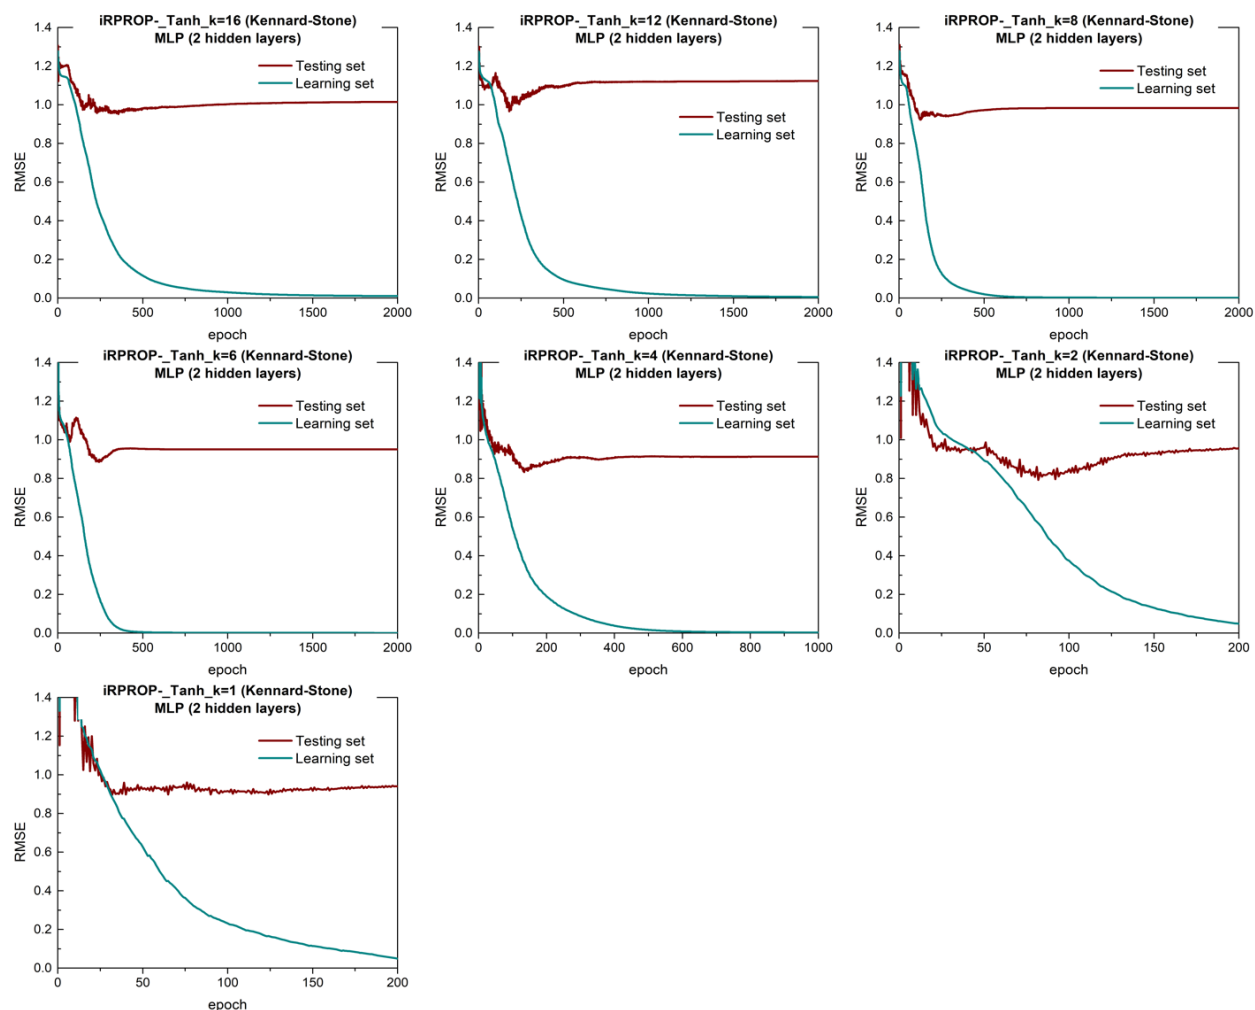

**Figure S20.** RMSE as a function of epoch for learning (training) and testing sets for an MLP with two hidden layers with iRPROP- learning algorithm and variable-length-array SMILES representation (Tanh activation, Kennard-Stone-based rational splitting algorithm), Dataset#1.

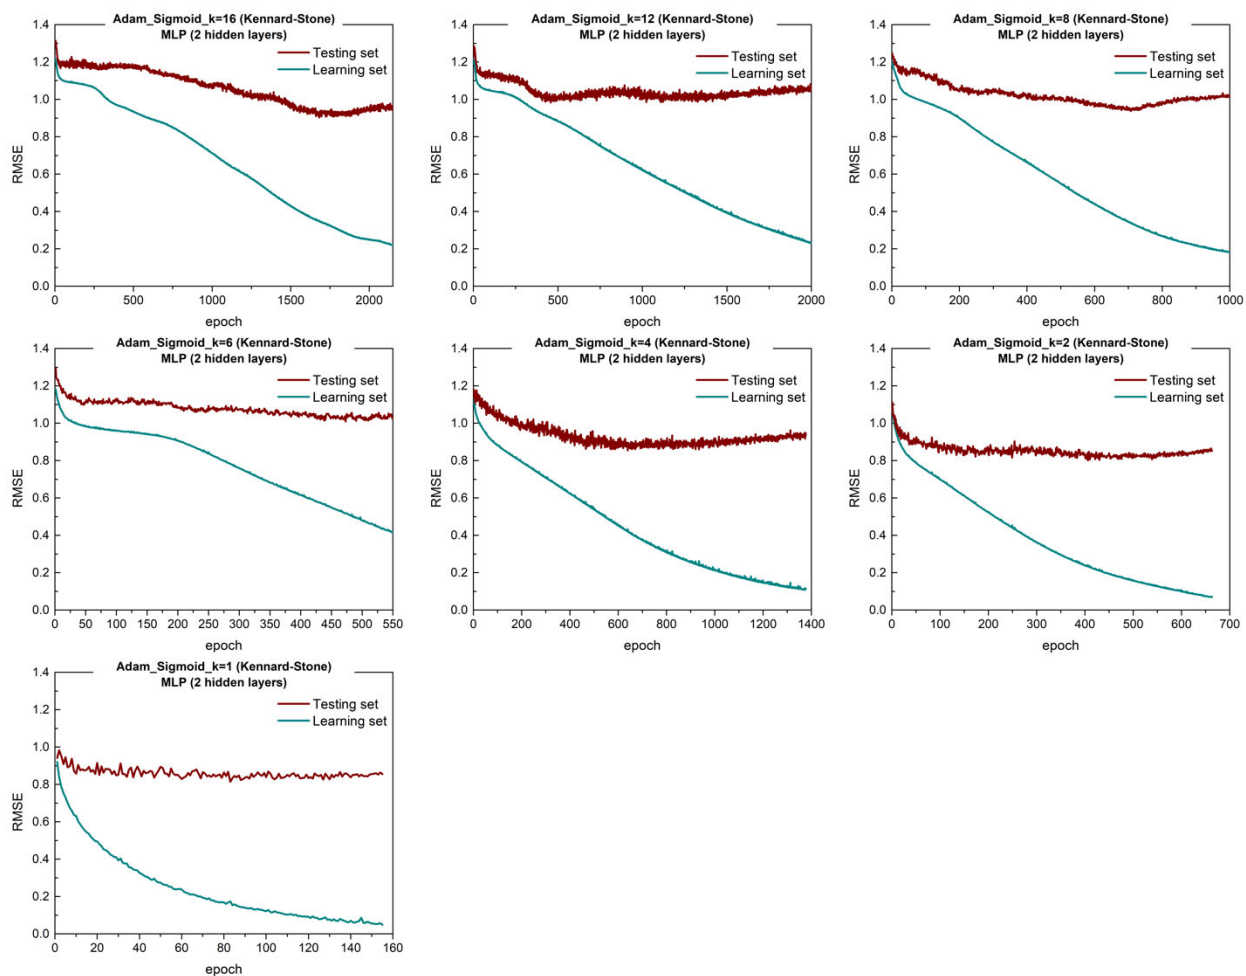

**Figure S21.** RMSE as a function of epoch for learning (training) and testing sets for an MLP with two hidden layers with Adam learning algorithm and variable-length-array SMILES representation (Sigmoid activation, Kennard-Stone-based rational splitting algorithm), Dataset#1.

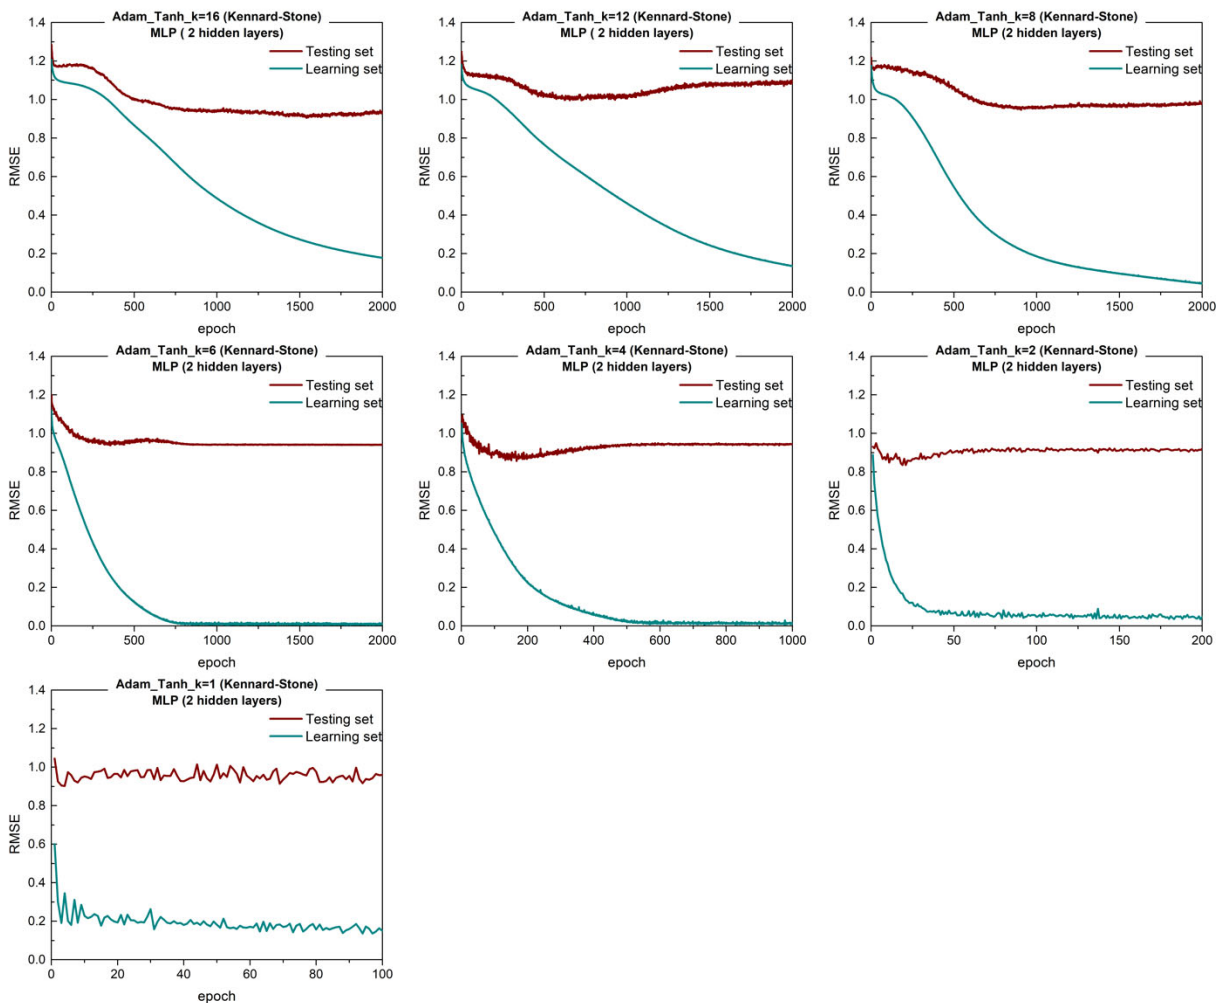

**Figure S22.** RMSE as a function of epoch for learning (training) and testing sets for an MLP with two hidden layers with Adam learning algorithm and variable-length-array SMILES representation (Tanh activation, Kennard-Stone-based rational splitting algorithm), Dataset#1.



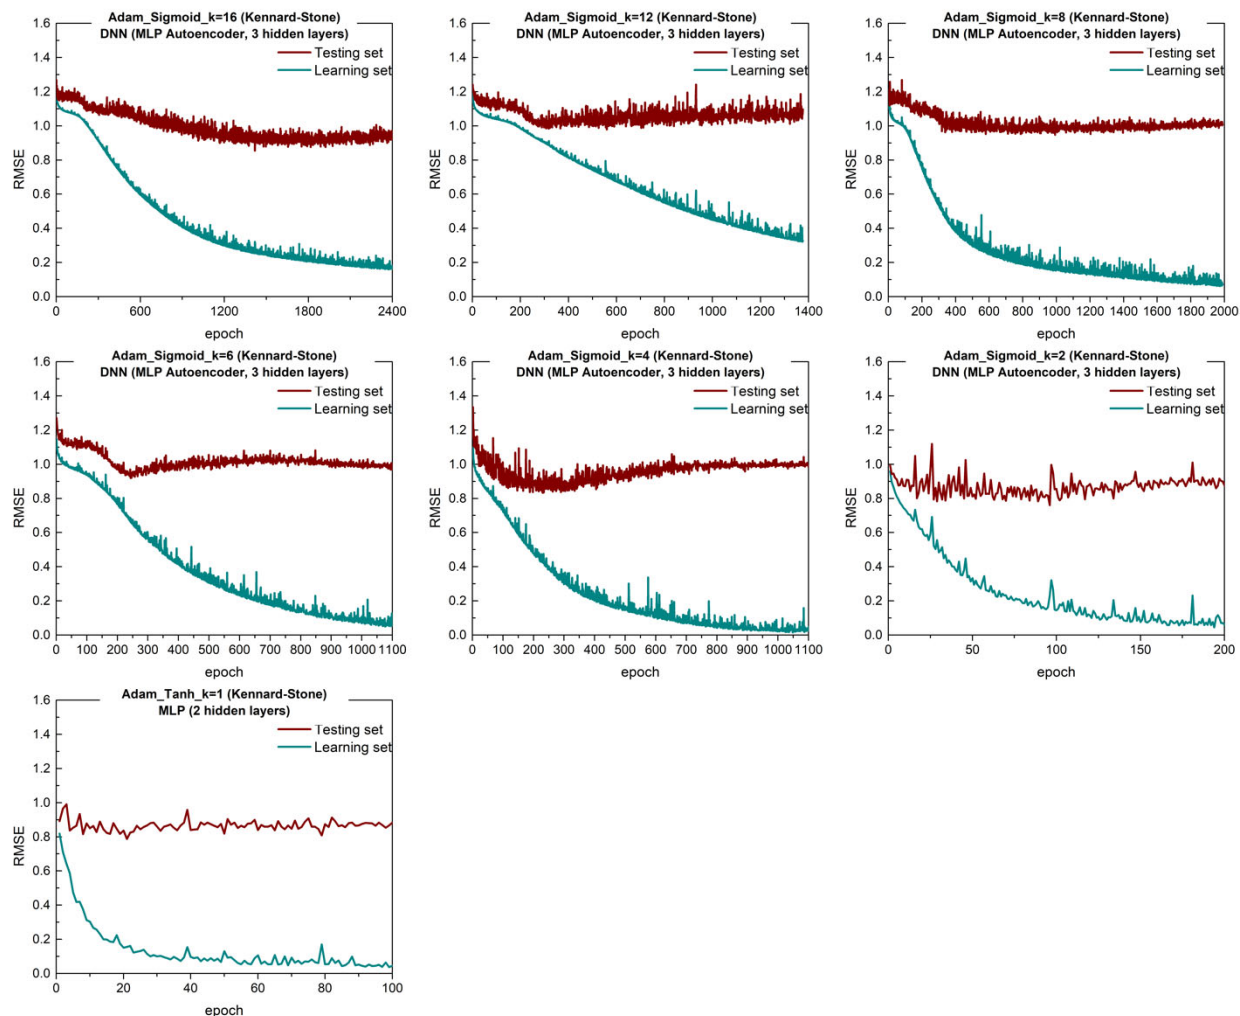

**Figure S23.** RMSE as a function of epoch for learning (training) and testing sets for an MLP with Autoencoder (three hidden layers with Adam learning algorithm and variable-length-array SMILES representation, Tanh activation, Kennard-Stone-based rational splitting algorithm), Dataset#1.

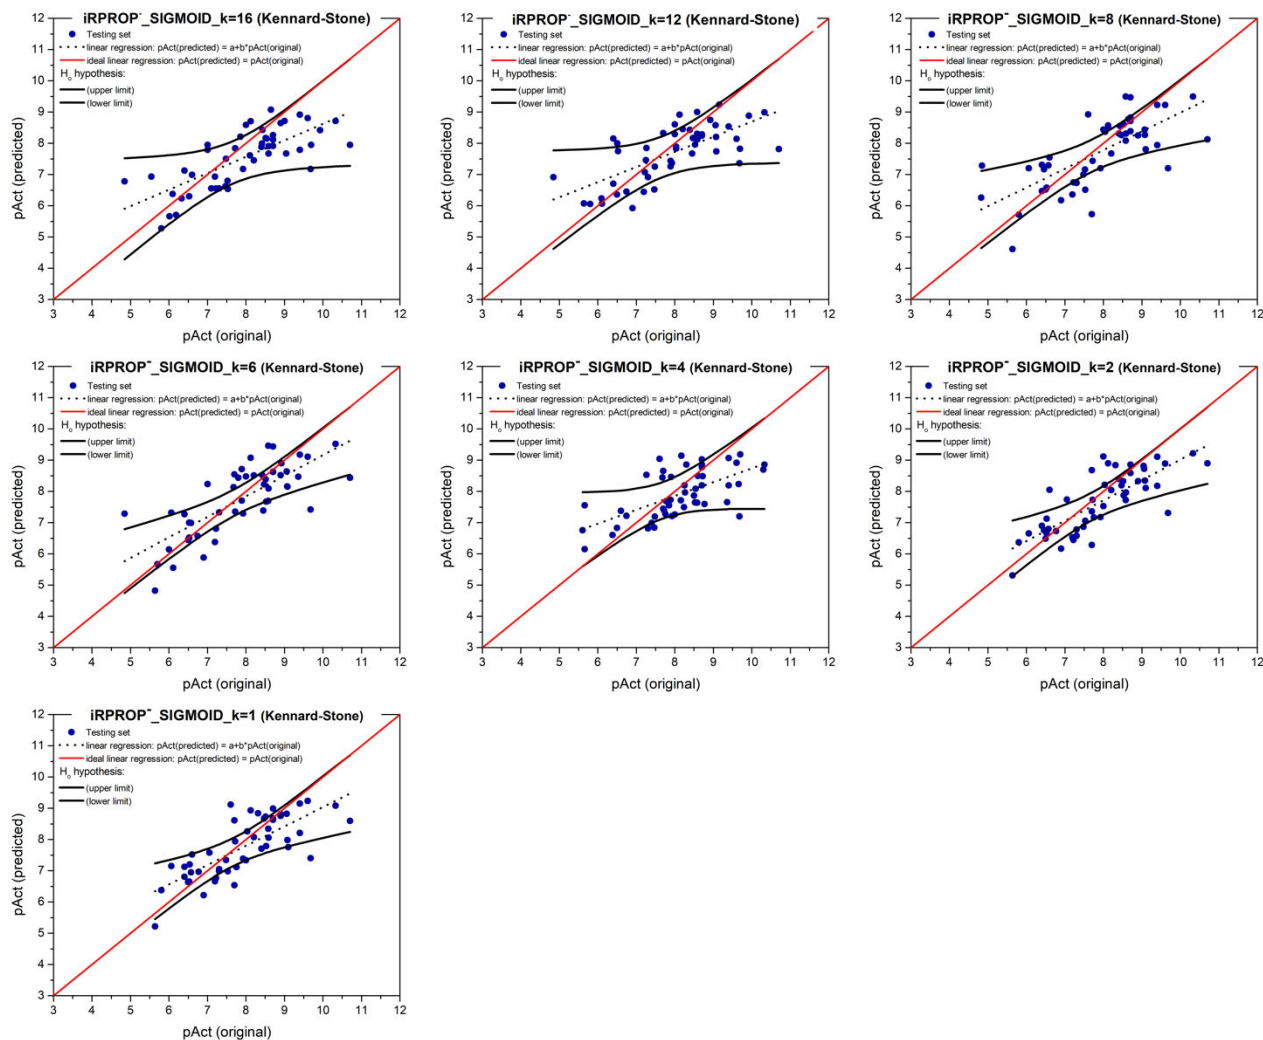

**Figure S24.** Parity plot and  $H_0$  hypothesis testing for a single-layer MLP prediction model with iRPROP<sup>-</sup> learning algorithm and variable-length-array SMILES representation (*Sigmoid*(*Y*) activation, Kennard-Stone-based rational splitting algorithm), Dataset#1.
